1 **Running Title:** Gene conversion in rice subspecies

2

3 **Corresponding author information:**

4 Jinpeng Wang

5 School of Life Sciences and Center for Genomics and Computational Biology, North

6 China University of Science and Technology, Tangshan, Hebei 063210, China.

7 Tel: 86-0315-8805600

8 E-mail: [wangjinpeng@ibcas.ac.cn](mailto:wangjinpeng@ibcas.ac.cn)

9

10 Li Wang

11 School of Life Sciences and Center for Genomics and Computational Biology, North

12 China University of Science and Technology, Tangshan, Hebei 063210, China.

13 Tel: 86-0315-8805600

14 E-mail: [wlish219@126.com](mailto:wlish219@126.com)

15

16 **Title:** Conversion between 100-million-year-old duplicated genes contributes to rice  
17 subspecies divergence

18

19 **Authors:** Chendan Wei, Zhenyi Wang, Jianyu Wang, Jia Teng, Shaoqi Shen, Qimeng Xiao,  
20 Shoutong Bao, Yishan Feng, Yan Zhang, Yuxian Li, Sangrong Sun, Yuanshuai Yue,  
21 Chunyang Wu, Yanli Wang, Tianning Zhou, Wenbo Xu, Jigao Yu, Li Wang, Jinpeng Wang

22

23 School of Life Sciences, and Center for Genomics and Computational Biology, North China  
24 University of Science and Technology, Tangshan, Hebei 063000, China (C.W., Z.W., J.W.,  
25 J.T., S.S., Q.X., S.B., Y.F., Y.Z., Y.L., S.S., Y.Y., C.W., Y.W., T.Z., W.X., W.X., L.W., and  
26 J.W.); University of Chinese Academy of Sciences, Beijing 100049, China (J.Y. and J.W.);  
27 State Key Laboratory of Systematic and Evolutionary Botany, Institute of Botany, Chinese  
28 Academy of Science, Beijing 100093, China (J.Y. and J.W.)

29 \*Address correspondence to Jin-Peng Wang (Email: [wangjinpeng@ibcas.ac.cn](mailto:wangjinpeng@ibcas.ac.cn)).

30

### 31 **One-sentence summary**

32 On-going gene conversion between duplicated genes produced by 100 mya polyploidization  
33 contributes to rice subspecies divergence, often involving the same donor genes at  
34 chromosome termini.

35

36 **Footnotes:**

37 We appreciate the financial support from the China National Science Foundation (3151333 to  
38 J.W.), Natural Science Foundation of Hebei Province (C20209064 and C2015209069 to  
39 J.W.).

40

41 **Author contributions**

42 J.W. and L.W. conceived and led the research. C.W. implemented and coordinated the  
43 analysis. Z.W., J.W., J.T., S.S., Q.X., S.B., Y.F., Y.Z., Y.L., S.S., Y.Y., C.W., Y.W., T.Z.,  
44 W.X., W.X., J.Y. and J.W. performed the analysis. J.W., C.W., Z.W., and J.W. wrote the  
45 paper.

46

47 **Competing interests**

48 The authors declare no competing financial interests.

49

## 50 **Abstract**

51 Extensive sequence similarity between duplicated gene pairs produced by  
52 paleo-polyploidization may result from illegitimate recombination between homologous  
53 chromosomes. The genomes of Asian cultivated rice *Xian/indica* (XI) and *Geng/japonica* (GJ)  
54 have recently been updated, providing new opportunities for investigating on-going gene  
55 conversion events. Using comparative genomics and phylogenetic analyses, we evaluated  
56 gene conversion rates between duplicated genes produced by polyploidization 100 million  
57 years ago (mya) in GJ and XI. At least 5.19%–5.77% of genes duplicated across three  
58 genomes were affected by whole-gene conversion after the divergence of GJ and XI at ~0.4  
59 mya, with more (7.77%–9.53%) showing conversion of only gene portions. Independently  
60 converted duplicates surviving in genomes of different subspecies often used the same donor  
61 genes. On-going gene conversion frequency was higher near chromosome termini, with a  
62 single pair of homoeologous chromosomes 11 and 12 in each genome most affected. Notably,  
63 on-going gene conversion has maintained similarity between very ancient duplicates,  
64 provided opportunities for further gene conversion, and accelerated rice divergence.  
65 Chromosome rearrangement after polyploidization may result in gene loss, providing a basis  
66 for on-going gene conversion, and may have contributed directly to restricted  
67 recombination/conversion between homoeologous regions. Gene conversion affected  
68 biological functions associated with multiple genes, such as catalytic activity, implying  
69 opportunities for interaction among members of large gene families, such as NBS-LRR  
70 disease-resistance genes, resulting in gene conversion. Duplicated genes in rice subspecies  
71 generated by grass polyploidization ~100 mya remain affected by gene conversion at high  
72 frequency, with important implications for the divergence of rice subspecies.

73

74 **Keywords:** rice, polyploidization, whole-genome duplication, duplicated genes, on-going  
75 gene conversion

76



---

## 77 Introduction

78 Rice is the largest food crop in the world. There are two distinct types of domesticated rice,  
79 Asian rice (*Oryza sativa*) and African rice (*Oryza glaberrima*), each with unique histories of  
80 domestication (Sweeney and McCouch, 2007). Asian rice is planted worldwide, feeding half  
81 of the world's population as staple food and providing more than 20% of the energy for  
82 human survival (Kim et al., 2008, Stein et al., 2018, Wang et al., 2018b). Xian/*Indica* (XI)  
83 and Geng/*Japonica* (GJ) are the two major subspecies of rice, which diverged ~0.4 million  
84 years ago (mya). The first whole-genome draft sequence of GJ cultivar 'Nipponbare', which  
85 is representative of the subspecies, was obtained in 2002 (Goff et al., 2002), and genome  
86 sequencing and annotation have been continuously improved (Tanaka et al., 2008). The  
87 whole-genome sequence of XI (93-11) has also been deciphered (Yu et al., 2002), with  
88 high-quality genome sequences of representative varieties Zhenshan 97 (XI-ZS97) and  
89 Minghui 63 (XI-MH63) made available (Zhang et al., 2016). These two main varieties of XI  
90 are the parents of an excellent Chinese hybrid. XI accounts for more than 70% of global rice  
91 production and possesses much higher genetic diversity than GJ (Huang et al., 2010), as  
92 highlighted by recent analysis of 3,010 diverse Asian cultivated rice genomes and 1,275 rice  
93 varieties (Li et al., 2020, Wang et al., 2018b).

94 Recursive polyploidization or whole-genome duplication (WGD) is the doubling of an  
95 entire set of chromosomes in cells and is prevalent throughout the plant and animal kingdoms  
96 (Frawley and Orr-Weaver, 2015). The impact of polyploidization on plant functional  
97 evolution is extremely profound, facilitating rapid expansion and divergence of species (Jiao  
98 et al., 2011, Puchta et al., 1996, Barker et al., 2016, Wu et al., 2020). A large number of  
99 duplicated genes generated by polyploidization are distributed on the homologous  
100 chromosomes of extant species, which leads to genome instability. Homoeologous  
101 recombination may result in loss of large segments of DNA (Paterson et al., 2004, Zhuang et  
102 al., 2019), de novo functionalization of genes, subfunctionalization (Taylor and Raes, 2004),  
103 or rearrangement of genomic DNA (Wang et al., 2005, Murat et al., 2017, Wang et al., 2018a,  
104 Wang et al., 2017), providing material for plant evolution. At least five WGD events occurred  
105 during the formation of modern cultivated rice. The two oldest are a WGD event (called  $\zeta$ )  
106 shared by seed plants (divergence ~310 mya) and a WGD event (called  $\epsilon$ ) that occurred prior  
107 to the appearance of the most recent common ancestor of all extant angiosperms (~235 mya)  
108 (Jiao et al., 2011). Two relatively recent WGD events occurred after the formation of

---

109 monocotyledons: one ( $\tau$ ) shared by most monocotyledons at ~130 mya, and another ( $\sigma$ )  
110 shared by Poales at ~115-120 mya (Tang et al., 2010, Paterson et al., 2004, Ming et al., 2015).  
111 The most recent WGD event ( $\rho$ ) was originally thought to have occurred before the  
112 divergence of major grasses (~70 mya) (Paterson et al., 2004, Wang et al., 2005); however,  
113 the latest fossil evidence advances this  $\rho$  event to ~100 mya (Wang et al., 2015).

114 Homologous recombination provides a major source of genetic innovation (Kurosawa  
115 and Ohta, 2011). In plants, meiotic and mitotic recombination result in reciprocal or  
116 symmetric exchange of DNA sequence information between homologous chromosomes  
117 (Gardiner et al., 2019). In addition to normal genetic recombination, highly similar sequences  
118 undergo frequent recombination between homologous chromosomes, which is called  
119 illegitimate recombination (Wang et al., 2009). One result of this recombination is gene  
120 conversion, where one gene (or DNA fragment) replaces another gene (or DNA fragment) on  
121 a homologous chromosome or chromosomal region. Gene conversion between duplicated  
122 genes produced by polyploidization has been identified in the genomes of *Poaceae*, *Arachis*  
123 *hypogaea*, *Gossypium*, *Brassica campestris*, and *Brassica oleracea* (Wang et al., 2009, Wang  
124 et al., 2011, Paterson et al., 2012, Zhuang et al., 2019, Yu et al., 2013, Liu et al., 2020). Gene  
125 conversion is frequent and on-going between homologous chromosomes, such as  
126 homologous chromosomes 11 and 12 produced from the duplication common to grasses ( $\rho$   
127 event) in the modern rice genome (Wang et al., 2009, Kurosawa and Ohta, 2011, Wang and  
128 Paterson, 2011, Wang et al., 2019).

129 Recombination is a mutagenic factor, and mutations lay the foundation for natural  
130 selection. The main role of gene conversion is to maintain the homology or similarity of  
131 duplicated sequences. Comparison between rice and sorghum clearly suggests that gene  
132 conversion promotes gene divergence (Wang et al., 2009). Recombination accelerates  
133 mutation, with gene conversion playing an important role (Guo et al., 2013). Gene conversion  
134 of functional sequences and new mutations produced by related homologous recombination  
135 may affect gene function. Sequences encoding functional domains are converted more  
136 frequently than those encoding non-functional domains (Wang et al., 2007). Gene conversion  
137 and DNA duplication may facilitate functional innovation through gene extension and  
138 mutations in structural domains of disease-resistance genes (Ratnaparkhe et al., 2011). Gene  
139 conversion between chromosomes 11 and 12 of rice has been accompanied by  
140 subfunctionalization or purifying selection of genes related to spikelet abortion (Zhang et al.,  
141 2011), lipid transfer genes (Jang et al., 2008, Wang et al., 2012), two recessive yellowing

142 control genes (Mao et al., 2011), genes encoding cyclic C2-type proteins (Jung et al., 2012),  
143 and the zinc-inducible promoter family (Ricachenevsky et al., 2011).

144 Our knowledge of gene conversion between paralogous genes in the two rice subspecies  
145 (Wang et al., 2007) is based on outdated genomic data (ver. 4), and the imperfections in  
146 genome sequencing assembly and annotation particularly may have implications for gene  
147 conversion analysis. Here, we used the latest genomic data and recent approaches for  
148 resolving genomic homology (Wang et al., 2018a) to identify paralogous genes generated by  
149 WGD event ( $\rho$ ) in three rice genomes representing the two major subspecies. We then  
150 combined this with comparative and phylogenetic genomics to establish an improved method  
151 for inferring gene conversion. We evaluated the ratio, level, and pattern of gene conversion in  
152 three rice genomes and explored the effects of this process on genome evolutionary rate, gene  
153 function innovation, chromosome structure, and genome stability.

154

---

## 155 **Results**

### 156 **Intra/intergenomic homologous genes**

157 We performed genomic colinearity and structure analysis and identified duplicated genes  
158 generated by the WGD event common to grasses in the GJ, XI-MH63, and XI-ZS97 genomes.  
159 For blocks containing more than four colinear genes, there were more duplicated genes in GJ  
160 (3,314 pairs) than in XI-MH63 or XI-ZS97 (2,629 pairs and 2,889 pairs, respectively). We  
161 identified 46, 18, and 10 homologous blocks with more than 10, 20, and 50 colinear gene  
162 pairs in GJ, respectively. XI genomes had much shorter duplicated blocks, with fewer than 10  
163 blocks possessing more than 50 colinear gene pairs (**Supplemental Table 1**). We also used a  
164 bidirectional best BLAST homology search to identify homologous gene pairs residing in  
165 paralogous regions because some pairs might have been removed from the colinearity  
166 analysis. Finally, 3,256, 2,502, and 2,816 homologous gene pairs were identified in GJ,  
167 XI-MH63, and XI-ZS97, respectively (**Figure 1**). Compared with GJ, the XI varieties had  
168 fewer homologous genes because XI has experienced more chromosomal rearrangement  
169 events.

170 We used colinearity and structure analysis of intergenomic homologous genes to infer  
171 orthologous genes generated by the recent species divergence (**Supplemental Table 1**).  
172 Colinearity analysis identified 19,089 orthologous gene pairs in 103 blocks between the GJ  
173 and XI-MH63 genomes. Between GJ and XI-ZS97, there were 18,498 orthologous gene pairs  
174 in 119 blocks. The two varieties of XI, XI-MH63 and XI-ZS97, showed better colinearity,  
175 with 25,262 orthologous gene pairs between them in 146 blocks. We again performed a  
176 bidirectional best BLAST homology search among the three genomes to identify additional  
177 orthologous genes. There were 23,719 orthologous gene pairs between GJ and XI-MH63, and  
178 23,056 orthologous gene pairs between GJ and XI-ZS97. Since XI-MH63 and XI-ZS97 are  
179 more closely related, we identified 35,049 orthologous gene pairs between the genomes of  
180 these varieties (**Supplemental Table 2**).

### 181 **Homologous gene quartets**

182 To detect possible gene conversion between homologous genes produced by WGD, we used  
183 homology and colinearity information to identify homologous gene combinations for WGD  
184 and species divergence, which we defined 'homologous gene quartets.' Assuming that the  
185 genomes of two species ('O' and 'S') retain a pair of duplicated chromosomal generated in a

186 common ancestor through WGD, the paralogous genes O1 and O2 in species O and the  
187 respective orthologous genes S1 and S2 in species S constitute a homologous gene quartet  
188 (**Figure 2A**). Sequence similarity between orthologous gene pairs is more similar than that  
189 between paralogous gene pairs if there is no gene conversion (or nonreciprocal recombination)  
190 between the duplicated gene pairs after species divergence (**Figure 2B**). However, if gene  
191 conversion occurs between duplicated genes, we might find that the gene tree topology has a  
192 different structure than expected (**Figure 2C-E**). Changes in the topological structure of the  
193 gene tree can be determined from the similarity of homologous sequences in homologous  
194 gene quartets. As the gene sequence may be converted in whole or in part, we used different  
195 methods to infer whole-gene conversion (WCV) and partial-gene conversion (PCV) (see  
196 Materials and Methods for details).

197 Based on colinearity information of intragenomic and intergenomic homologous genes,  
198 we identified 2,788 quartets between GJ and XI-MH63, and 2,879 quartets between GJ and  
199 XI-ZS97. Although XI-MH63 and XI-ZS97 are varieties of the same subspecies, relatively  
200 few quartets (2,566) were identified between them, probably due mainly to differences in  
201 gene loss after the three genomes diverged. By comparing the three genomes, we inferred a  
202 possible ancestral gene content before divergence of 19,104. Rates of gene loss or  
203 translocation were 6.13%, 13.31%, and 7.89% in GJ, XI-MH63, and XI-ZS97, respectively.  
204 Finally, we identified 3,332, 3,322, and 3,254 homologous genes in GJ, XI-MH63, and  
205 XI-ZS97, respectively. These homologous genes were mainly conserved in 82, 85, and 93  
206 blocks, and they were unevenly distributed across the 12 chromosomes in the three genomes  
207 (**Figure 1**).

## 208 **Gene conversion and occurrence patterns**

209 We removed highly divergent sequences to reduce the possibility of inferring gene  
210 conversion events from unreliable sequences (see Materials and Methods for details). After  
211 this, 2,788 gene quartets were identified between GJ and XI-MH63, 2,879 quartets between  
212 GJ and XI-ZS97, and 2,566 quartets between XI-ZS97 and XI-MH63 (**Supplemental Table**  
213 **2**). We used two methods to infer gene tree topology, one based on synonymous nucleotide  
214 substitution rate ( $K_s$ ) as a similarity measure and the other based on amino acid identity ratio,  
215 which we called whole-gene conversion type I and type II (WCV-I and WCV-II), respectively.  
216 We used a combination of dynamic planning and phylogenetic analysis to infer possible  
217 partial-gene conversion (PCV) events (**Supplemental Table 3**). Since paralogous gene pairs

218 may be identified in different quartets, we merged the paralogous gene pairs affected by gene  
219 conversion in each genome. This gave us the gene conversion events of each genome after  
220 the divergence of rice.

221 In GJ, 398 pairs (~12%) of paralogs had been converted. Of these, 179 pairs (5.37%)  
222 had undergone WCV: 11 pairs were inferred by WCV-I and 168 pairs were inferred by  
223 WCV-II. Another 259 pairs (7.77%) were PCVs, which occurred at a remarkably higher rate  
224 than WCV. In XI-MH63, 466 pairs (~14%) of paralogs had been converted, of which 182  
225 pairs (5.48%) were WCVs: 8 pairs were inferred by WCV-I and 174 pairs were inferred by  
226 WCV-II. Another 312 pairs (9.39%) were PCVs, which was significantly higher than WCVs.  
227 In XI-ZS97, 468 pairs (~14%) of paralogs had been converted: 185 pairs (5.69%) were  
228 WCVs, comprising 8 pairs inferred by WCV-I and 177 pairs inferred by WCV-II. Another  
229 310 pairs (9.53%) were PCVs, which was also more than the number of WCVs (**Table 1**). For  
230 example, we detected gene conversion between the paralogous genes *Zs11g0407.01* and  
231 *Zs12g0396.01*, and one gene fragment from 335 to 462 bp was converted through one-way  
232 genetic information transmission (or rearrangement) (**Figure 3A**). We discovered that the  
233 gene conversion rate in XI was significantly higher than that in GJ (**Figure 3B**). By analyzing  
234 topological changes in the gene trees reconstructed using homologous genes, we further  
235 determined that gene conversion occurred between *Mh11g0214.01* and *Mh12g0189.01*  
236 (**Figure 3C; Supplemental Text**).

### 237 **High-frequency on-going gene conversion**

238 By comparing the similarity of homologous gene quartets between different genomes, we  
239 inferred gene conversion events in the three genomes during different evolutionary periods.  
240 Duplicated gene pairs produced ~100 mya were still being affected by gene conversion. In GJ,  
241 we identified 398 pairs of paralogous genes that might have undergone gene conversion after  
242 the divergence of rice (**Figure 3D**). The amino acid identity of four (1.01%) pairs of  
243 paralogous genes was > 99%, with  $K_s < 0.01$  (**Supplemental Figures 1 and 2**). A relatively  
244 large number of duplicated genes were affected by gene conversion in the two XI varieties,  
245 XI-MH63 and XI-ZS97. In XI-MH63, we found 466 pairs of paralogous genes that might  
246 have undergone gene conversion (**Figure 3D**) after the divergence of rice subspecies; six  
247 (1.29%) of these pairs of paralogous genes had > 99% amino acid identity between them and  
248  $K_s < 0.01$  (**Supplemental Figures 1 and 2**). Similarly, we identified 471 pairs of paralogous  
249 genes in XI-ZS97 that might have undergone gene conversion after GJ diverged from XI



250 **(Figure 3D)**, and six (1.27%) of these pairs of paralogous genes had > 99% amino acid  
251 identity between them and  $K_s < 0.01$  (**Supplemental Figures 1 and 2**). We identified small  
252 synonymous and nonsynonymous nucleotide substitutions and high sequence identity  
253 between duplicated gene pairs in which gene conversion had occurred, suggesting that gene  
254 conversion may have occurred over a very short time.

255 Another striking indication was that 407 and 391 pairs of paralogous genes were  
256 affected by gene conversion before the formation of XI-MH63 and XI-ZS97, respectively; 78  
257 and 79 pairs of paralogous genes were converted after formation of the two varieties,  
258 accounting for 16.7% and 16.6% of the total gene conversion, respectively (**Figure 3D**).  
259 Duplicated genes in XI-MH63 and XI-ZS97 sharing a homologous region showed nearly 99%  
260 amino acid identity and 0.99 nonsynonymous nucleotide substitution rate ( $K_s$ )  
261 (**Supplemental Figures 1 and 2**). These data suggest that gene conversion between  
262 paralogous gene pairs is on-going and occurs at high frequencies in rice subspecies.

### 263 **A donor is usually a donor**

264 Gene conversion involves a donor locus and an acceptor locus. Donors and acceptors can be  
265 identified by comparing topological changes in the phylogenetic trees of homologous gene  
266 quartets since the paralog of the donor should be more similar than its ortholog. Donors have  
267 at least 30% more converted sites than acceptors. We found that 765, 934, and 930 duplicated  
268 genes had been converted in GJ, XI-MH63, and XI-ZS97, respectively, with 196, 215, and  
269 200 of these representing donors. A total of 1,520 duplicated genes had been converted in the  
270 three genomes, with 1,378 (90.66%) of these converted in two or three genomes. Interestingly,  
271 113 (88.98%) genes had preferred donors in at least two genomes, and 85 (66.93%) genes  
272 had the same donor in the three genomes (**Supplemental Table 4**). This suggested that the  
273 duplicated gene that had undergone gene conversion was usually present as a donor locus in  
274 each different genome (**Figure 4A**). For example, in the region of ~1.0 Mb near the telomere  
275 on chromosomes 11 and 12, gene conversion had occurred in 13 duplicated genes. Twelve  
276 duplicated genes had undergone gene conversion in at least two genomes. Ten duplicated  
277 genes were present as donors, and seven duplicated genes acting as donors in different  
278 genomes (**Figure 4B**).

### 279 **Gene conversion and uneven distribution**

280 Gene replacement and conversion were unevenly distributed across the different paralogous

281 homologous chromosomal regions, and all three genomes were most affected by gene  
282 replacement and conversion between duplicated genes on chromosomes 11 and 12. The gene  
283 conversion rate was 18.88%, 21.78%, and 18.71% on chromosomes 11 and 12 of GJ,  
284 XI-MH63, and XI-ZS97, respectively (**Supplemental Table 5**). In GJ, XI-MH63, and  
285 XI-ZS97, gene conversions were clustered in the 2 Mb region at the termini of chromosomes  
286 11 and 12, and the gene conversion rate was 74.60%, 67.11%, and 73.02%, respectively. This  
287 suggests that gene conversion usually occurs at the termini of chromosomes. (**Figure 1D**).

288 The physical location of genes on chromosomes may influence the chance of gene  
289 conversion. Gene conversion is usually found at the termini of chromosomes, where gene  
290 density is high (**Figure 1; Table 2**). In GJ, 692 paralogs were located in the 2 Mb at the  
291 termini of chromosomes and about 17.20% of the paralogs were converted. This was higher  
292 than the gene conversion rate for the whole genome (12.09%). In XI-MH63, we found 584  
293 paralogs in the 2 Mb at the termini of chromosomes, and approximately 25.34% showed gene  
294 conversion, which was also higher than the gene conversion rate for the whole genome  
295 (18.57%). In XI-ZS97, there were 675 paralogs located in the 2 Mb close to the termini of  
296 chromosomes, of which about 20.59% had undergone gene conversion, which was higher  
297 than the gene conversion rate for the whole genome (16.62%). We found that the physical  
298 location of genes on chromosomes may correlate with the chance of gene conversion, with  
299 genes near the chromosomal termini more frequently affected by gene conversion.

### 300 **Effect of chromosome rearrangement on gene conversion**

301 Chromosome rearrangement is a random process, and block number in the genome can  
302 reflect the degree of chromosome rearrangement after polyploidization. Block number and  
303 gene conversion rate showed a positive correlation (**Supplemental Table 6**) in XI-MH63 ( $R^2$   
304 = 0.22, P-value = 0.12), XI-ZS97, and GJ. However, there was no significant positive  
305 correlation in the three genomes (**Figure 5A**). If four special homologous chromosomes  
306 (homologous chromosome pairs 1-5 and homologous chromosome pairs 11-12) were  
307 removed, there was a significant positive correlation between block number and gene  
308 conversion rate in XI-MH63 ( $R^2 = 0.85$ , P-value < 0.01). There was also a significant positive  
309 correlation between block number of the chromosomes and gene conversion rate in XI-ZS97  
310 ( $R^2 = 0.75$ , P-value < 0.01) and GJ ( $R^2 = 0.74$ , P-value < 0.01) (**Figure 5B**).

311 Correlation does not imply a direct factor leading to gene conversion. For this reason,  
312 we further analyzed the relationship between block length and gene conversion rate on each



313 chromosome (**Supplemental Table 7**). We found that longer blocks had a higher gene  
314 conversion rate (**Supplemental Figure 3**). The average gene conversion rate for a total of 14  
315 blocks with more than 100 paralogous gene pairs was 14.12% (349 pairs). The block with  
316 fewer than 20 paralogous gene pairs was block 219, with a gene conversion rate of 11.77%  
317 (178 pairs). These results indicate that the direct result of chromosome rearrangement is the  
318 loss of duplicated genes, which may increase the chances of gene conversion. However,  
319 chromosome rearrangement may also reduce recombination between chromosomes and  
320 inhibit gene conversion.

### 321 **Gene conversion and evolution**

322 Gene conversion homogenizes paralogous gene sequences. This makes the affected  
323 homologous genes appear younger than expected, based on sequence divergence with one  
324 another. The synonymous substitution rate ( $P_n$ ) and nonsynonymous substitution rate ( $P_s$ )  
325 between paralogs undergoing gene conversion were smaller than those of paralogs not  
326 affected by gene conversion (**Table 3**). In GJ, the average  $P_n=0.20$  and  $P_s=0.46$  for converted  
327 genes were significantly smaller than the average  $P_n=0.25$  and  $P_s=0.51$  for genes not  
328 converted. The average  $P_n=0.18$  and  $P_s=0.44$  for XI-MH63 gene conversion were  
329 significantly smaller than the average  $P_n=0.23$  and  $P_s=0.49$  for XI-MH63 genes with no  
330 conversion. XI-ZS97 gene conversion had average  $P_n=0.18$  and  $P_s=0.45$ , which was  
331 significantly smaller than the average  $P_n=0.24$  and  $P_s=0.49$  for genes showing no conversion.  
332 We could not determine whether converted genes evolve slowly based on the paralogs  
333 themselves, since pairwise distances between paralogs are converted. However,  $P_n$  and  $P_s$   
334 were slightly larger between orthologous gene pairs affected by gene conversion than  
335 between orthologs not showing gene conversion. This suggests that the orthologs in which  
336 gene conversion has occurred have evolved faster than those not affected by gene conversion.

337 We used  $P_s$  and  $P_n$  for determining whether gene conversion was affected by  
338 evolutionary selection pressure. The ratio of  $P_n/P_s$  reflects the selection pressure between  
339 gene pairs during evolution. We compared the  $P_n/P_s$  ratio between genes subjected to  
340 conversion and those with no conversion. The average  $P_n/P_s$  ratio for XI-MH63 gene  
341 conversion was 0.41, and the average  $P_n/P_s$  ratio of non-converted paralogs was 0.48. This  
342 indicates that converted genes were subject to purifying selection (**Table 3**). The  $P_n/P_s$  ratios  
343 for gene conversion in XI-ZS97 and GJ were also smaller than those for non-converted genes.  
344 The selection pressure for gene conversion or no gene conversion did not change much.

345 However, there was not much difference in the selection pressure between orthologous gene  
346 pairs with and without gene substitution. No evidence suggests a change in selection pressure  
347 of converted genes.

### 348 **On-going gene conversion and function**

349 Some duplicated genes are preferentially converted. We performed Gene Ontology (GO)  
350 analysis to relate duplicated genes to biological functions. The GO analysis revealed that  
351 some genes with specific functions may be preferred for conversion, while gene conversion  
352 of some functional genes is avoided (**Supplemental Figures 4-6; Supplemental Table 8**).  
353 We analyzed 761, 910, and 912 duplicated genes with gene conversion and 5,262, 5,224, and  
354 5,135 duplicated genes without gene conversion in GJ, XI-MH63, and XI-ZS97, respectively.  
355 Genes involved in functions associated with large numbers of genes (catalytic activity,  
356 metabolic process) were biased toward gene conversion in the three genomes. By contrast,  
357 some genes associated with functions encoded by few genes (protein-containing complex,  
358 transporter activity) might have avoided gene conversion.

359 GO analysis of duplicated genes with and without gene conversion suggested that genes  
360 associated with functions encoded by a large number of genes are more biased towards gene  
361 conversion (**Table 4**). Four secondary-level terms were significantly enriched at the level of  
362 molecular function and biological processes, and accounted for about 30% of the  
363 corresponding gene sets. For example, the number of catalytic activity genes and metabolic  
364 process genes in the three genomes in which gene conversion occurred (31.4% - 37.7%) was  
365 significantly more than that in which no gene conversion occurred (26.6% - 30.6%) (P-value  
366 < 0.01). Similarly, binding genes and cellular process genes showed higher gene conversion  
367 (27.4% - 39.9%) than duplicated genes without gene conversion (24.6.6% - 38.4%),  
368 suggesting that they are more likely to be converted.

### 369 **Evolution and conversion of NBS-LRR genes**

370 Rice diseases caused by various pathogens are one of the most serious constraints in global  
371 rice production (Divya et al., 2014). Disease resistance genes play a very important role in the  
372 evolution of plant genomes and are one of the indispensable families of genes for survival of  
373 plants under natural selection (Keen, 1992, Bertoli et al., 2016). We therefore identified  
374 1,697 NBS-LRR (nucleotide binding site-leucine rich repeat) resistance genes in the three  
375 genomes (**Supplemental Table 9**). Among these, we identified 462 NBS-LRR genes in GJ,

376 less than in XI-MH63 (644) and XI-ZS97 (591). The NBS-LRR genes were unevenly  
377 clustered on the chromosomes of the three genomes. The density on chromosome 11 was the  
378 highest, as confirmed in previous studies (Zhang et al., 2014, Stein et al., 2018). We found  
379 113 (24.46%), 126 (21.32%), and 181 (28.11%) NBS-LRR genes on chromosome 11 of GJ,  
380 XI-MH63, and XI-ZS97, respectively. There were more NBS-LRR genes on chromosome 11  
381 than on the other chromosomes (3.68% - 10.66%).

382 GO analysis of NBS-LRR genes in the genomes revealed enrichment mainly in terms  
383 associated with molecular function and biological process (**Supplemental Figure 7**). In GJ,  
384 XI-MH63, and XI-ZS97, 97%, 91.1%, and 93.1% of genes, respectively, were involved in  
385 binding (P-value=0.01) (**Supplemental Table 10**). Therefore, the NBS-LRR genes may be  
386 associated with the molecular function of binding and might be biased toward the occurrence  
387 of gene conversion. Polyploidization may also result in expansion of NBS-LRR genes, with  
388 ectopic recombination causing the NBS-LRR genes to further undergo a birth-to-death  
389 process. Evolutionary analysis of the NBS-LRR genes revealed 25, 67, and 39 young genes  
390 with  $K_s < 0.1$  in the three genomes (**Figure 6A-C**). Most of the NBS-LRR genes were  
391 generated after the divergence of rice subspecies, and clusters of young NBS-LRR genes  
392 were found on chromosomes 2 and 11. These NBS-LRR genes showed a pattern of proximal  
393 localization and young origin in the three genomes, as well as similarity in gene conversion.  
394 We found a positive correlation between NBS-LRR genes and converted genes in regions  
395 with more than 1% of the NBS-LRR genes in the three genomes. This suggested that during  
396 their evolution, NBS-LRR genes might have had many chances to interact with one another,  
397 leading to gene conversion. (**Figure 6D**).

## 398 **Discussion**

### 399 **On-going conversion between duplicated genes**

400 Recombination between neo-homologous chromosome pairs or homologous chromosome  
401 pairs resulting from WGD has existed throughout a long evolutionary history, generated a  
402 large number of chromosomal rearrangements (Murat et al., 2010, Bowers et al., 2003, Murat  
403 et al., 2014). This recombination can persist for a long time, maybe even hundreds of millions  
404 of years (Wicker et al., 2015). Previous studies have illustrated that many duplicated genes  
405 from WGD events about 100 mya are affected by illegitimate recombination and gene  
406 conversion (Jacquemin et al., 2009, Jacquemin et al., 2011). In some genomic regions, this

---

407 effect persists for millions of years, especially on chromosomes 11 and 12 of rice (Wang et al.,  
408 2007). We used new, high-quality genomic data to analyze the genome sequences of GJ,  
409 XI-ZS97, and XI-MH63, revealing the level and pattern of gene conversion in all  
410 homologous genes of modern crop rice during domestication and improvement. Study of  
411 gene conversion after the divergence of rice subspecies and after the divergence of the two XI  
412 varieties revealed a shared region of gene substitution between XI-MH63 and XI-ZS97. This  
413 suggests that gene conversion may be on-going for a long time in the evolution of species and  
414 continue to provide a driving force in genome evolution and genetic innovation.

#### 415 **Gene conversion has contributed to cultivated rice divergence**

416 Gene conversion is the result of recombination. Classical theoretical studies point out that  
417 recombination accelerates mutation (Kozul and Fischer, 2009, Jacquemin et al., 2011). Gene  
418 conversion may therefore play an important role in recombination, and we used the results of  
419 the new data analysis to further confirm this conclusion. We identified that the  $K_s$  between  
420 orthologous genes showing gene conversion was significantly smaller than that of  
421 orthologous genes without conversion. This suggests that genes having undergone gene  
422 conversion may have evolved more rapidly, which has been demonstrated by previous studies  
423 (Chen et al., 2007, Wang and Paterson, 2011). Gene conversion is one of the major  
424 mutational mechanisms in the evolution of species. Gene conservation can provide  
425 opportunities for gene conversion (Cossu et al., 2017). Our results showed that 46% of  
426 ancient gene conversions may have again undergone gene conversion more recently after the  
427 divergence of rice subspecies. Gene conversion is an accelerating force in the genetic  
428 evolution of mutations. After gene conversion, these genes restart the evolutionary process  
429 and accelerate the divergence of rice subspecies.

#### 430 **Gene conversion and chromosome rearrangement**

431 Our results showed that the degree of chromosome rearrangement and gene conversion rate  
432 are positively correlated. However, gene conversion is not necessary for the survival of the  
433 species, as most grass species have undergone massive chromosome rearrangements (Murat  
434 et al., 2010, Wang et al., 2019). Previous reports suggest that the occurrence of a large  
435 inversion in the short arm before the rice–sorghum divergence may suppress gene conversion,  
436 with the lowest rate of gene conversion occurring between chromosomes 1 and 5 in rice  
437 (Wang et al., 2009, Paterson et al., 2009). However, we did not find the lowest rates of gene  
438 conversion in the three genomes of rice subspecies between chromosomes 1 and 5, possibly

439 because chromosome recombination may be stage-specific. Shorter homoeologous regions  
440 are a modern state resulting from historical evolution. We found more chromosomal  
441 rearrangements in XI than GJ, which may lead to gene loss, and relatively more gene  
442 conversion. Chromosome rearrangement might result in gene loss and thus provide  
443 conditions for on-going gene conversion. Chromosome rearrangement might have directly  
444 contributed to restriction of recombination/conversion between homoeologous regions.

#### 445 **Why is a donor usually a donor?**

446 Gene conversion is to copy one gene sequence from a donor locus to a receptor locus (Harpak  
447 et al., 2017). Analyzing the scale of gene conversion helps to illuminate the mechanism of  
448 gene conversion (Cossu et al., 2017). We found that independent conversions that have  
449 survived (so far) in different lineages have often used the same genes as donors. It seems  
450 improbable to attribute this to selection, noting that the donor and acceptor copies have  
451 coexisted in the genome for 100 million years. A more plausible explanation is that one gene  
452 copy has some ‘privileged’ nature over the other. This could be genetic or epigenetic. If one  
453 copy or its neighboring region possesses mutations or epigenetic changes, the other copy  
454 might be more likely to act as a donor, helping to reinstate intactness. Moreover, some  
455 homologous chromosomal segments also seem to be preferential donors rather than acceptors.  
456 Mechanisms underlying these biases remain unknown, but an exciting future investigation  
457 will be to explore epigenetic phenomena such as have been suggested to influence patterns of  
458 gene retention/loss along chromosome segments (Woodhouse et al., 2010).

#### 459 **Gene conversion and function**

460 Gene conversion leads to genes similar or even identical in sequence. The analysis above  
461 indicates that large gene families may be more susceptible to gene conversion. Duplicated  
462 copies may neutralize the presence of putative mutations, providing an opportunity for  
463 functional innovation (Daugherty and Zanders, 2019). Rather than being a conservative factor  
464 among different genotypes, gene conversion accelerates divergence (Wang et al., 2011). Gene  
465 conversion has been used to explain the evolution of large gene families, such as NBS-LRR  
466 genes and rRNA genes, which typically have dozens of copies on chromosomes (Okuyama et  
467 al., 2011, Nawrocki and Eddy, 2013, Rooney, 2004). Extensive analysis has shown that the  
468 evolution of functional genes that are members of large families may often be accompanied  
469 by strong purifying selection. Until 1990, most multigene families were thought to have  
470 coevolved with related homologous genes through gene conversion (Godiard et al., 1994).

471 Evolution of the NBS-LRR gene family, rRNA gene family, and some other highly conserved  
472 gene families may be consistent with this conclusion. For these families, most genes are  
473 usually extremely similar. However, the evolution of other gene families may be better  
474 explained by the birth-and-death model. New genes are created through gene duplication, and  
475 some genes remain in the genome for a long time while others may be lost (Finet et al.,  
476 2019).

477

## 478 **Materials and Methods**

### 479 **Sequence data**

480 Genomic sequence data for XI-MH63 and XI-ZS97 were obtained from the GenBank  
481 database (<https://www.ncbi.nlm.nih.gov/>). Genomic data for GJ ‘Nipponbare’ and  
482 *Arabidopsis thaliana* were downloaded from genome databases Gramene  
483 (<http://www.gramene.org/>) and TAIR (<https://www.arabidopsis.org/>), respectively.

### 484 **Detection of duplicated segments and homologous gene quartets**

485 BLASTP (Camacho et al., 2009) was used to search for intragenomic and intergenomic  
486 homology of protein sequences ( $E < 1e-5$ ). ColinearScan (Wang et al., 2005) was used to  
487 analyze colinear regions based on gene homology predictions, and the significance of  
488 colinearity was tested. Colinear intragenomic and intergenomic chromosome fragments were  
489 inferred from analysis of homologous genome structures, and homologous and colinear genes  
490 were determined. Blocks of homologous genome structure within and between rice  
491 subspecies were also deduced. These blocks might represent paralogs produced by WGD  
492 events in the common ancestor or orthologs caused by species divergence. To determine  
493 homology and colinearity between chromosomes, genes in large gene families were removed  
494 from the ColinearScan analysis. Therefore, to obtain more complete homology information  
495 within genomes, further bidirectional best BLASTP homology searches were performed on  
496 the three genomes. Gene quartets were inferred from intragenomic and intergenomic paralogs  
497 and orthologs.

### 498 **Inference of gene conversion**

499 To infer possible gene conversion between paralogs, ClustalW (Larkin et al., 2007)



---

500 comparison of the quartets identified between any two genomes was performed. Highly  
501 divergent sequences were removed to eliminate potential problems created by inferring gene  
502 conversion from unreliable sequences. Quartets showing gaps in the pairwise alignments  
503 exceeding 50% of the alignment length, or with amino acid identity between homologous  
504 sequences of less than 40% were removed.

505 *Whole-genome conversion (WCV) inference:* Since paralogous genes arise before  
506 species divergence, the similarity between orthologous gene pairs in two species should be  
507 higher than the similarity between paralogous gene pairs. However, gene conversion events  
508 change the similarity between gene pairs. The first whole-genome conversion inference  
509 method (WCV-I) used was based on studying the homology relationship between genomes,  
510 using  $K_s$  value as a similarity measure. The  $K_s$  values between paralogous and orthologous  
511 gene pairs were used to infer possible gene conversion, and 1000 bootstrap tests were  
512 performed on all gene trees in which gene conversion occurred to obtain the confidence level  
513 for each gene (Wang et al., 2009, Wang and Paterson, 2011). The second whole-genome  
514 conversion inference method (WCV-II) calculated the ratio of amino acid locus identity  
515 between homologous gene pairs, and compared point-by-point homology between paralogous  
516 gene pairs and between orthologous gene pairs. These sequences were used to infer possible  
517 changes to evolutionary tree topology, depending on whether the paralogous genes were more  
518 similar to each other than orthologous genes (Wang et al., 2009). This is a strict criterion, as  
519 paralogs were produced at least 100 mya from a WGD, whereas orthologs have diverged  
520 more recently. Instead of using  $K_s$  values as a metric here, identical sites between  
521 homoeologous sequences were calculated directly. The similarity between sequences  
522 representing different rice subspecies is often very high, as in a previous study of hexaploid  
523 wheat (Liu et al., 2020).

524 *Partial-gene conversion (PCV) inference:* Quartets were used to identify possible gene  
525 conversion among partial gene sequences that may occur after species divergence. A  
526 combination of dynamic planning and phylogenetic analysis was used to document the  
527 differences between two aligned bases from paralogous and orthologous genes for each  
528 genome. In averaged distance arrays, the paralogs in each species should be more distant if  
529 no PCV was involved. Bootstrap frequency was obtained by repeating the 1000 bootstrap  
530 tests to identify high-scoring segments with shorter lengths and smaller scores. After masking  
531 some of the larger fragments, a recursive procedure revealed shorter high-scoring fragments,  
532 which helped to reveal genes affected by multiple gene conversion events (Wang et al.,

533 2009).

### 534 **GO enrichment analysis**

535 The GO data search software InterProScan (Jones et al., 2014) was used to determine  
536 whole-genome GO functional annotation. GO annotation results of the gene sets were  
537 compared and plotted using the online visualization tool WEGO (Ye et al., 2018) to visualize  
538 the distribution of functional genes and trends. The significance of the enrichment of  
539 GO-annotated genes was explained using calculated P-value.

### 540 **Identification of disease-resistance genes**

541 The comparison software HMMscan (Eddy, 2011) was used to identify NBS-LRR domains in  
542 the whole genomes of GJ, XI-MH63, and XI-ZS97, and NBS-LRR gene set A was obtained.  
543 The whole genome of the model organism *Arabidopsis thaliana* was searched for the  
544 NB-ARC domain (PF00931) using HMMsearch (Eddy, 2011) to identify NBS-LRR domains  
545 with E-value of 1e-10. After obtaining the NBS-LRR genes of *Arabidopsis thaliana*,  
546 BLASTP was used to compare these sequences with the whole genomes of GJ, XI-MH63,  
547 and XI-ZS97. Genes with a score value of > 150 and E-value > 1e-10 were designated  
548 NBS-LRR gene set B of the rice subspecies. Genes present in both gene sets A and B were  
549 identified as NBS-LRR genes in the three genomes.

550

### 551 **Accession Numbers**

552 Sequence data from this article can be found in Materials.

553

### 554 **Supplemental Data**

555 **Supplemental Text** Gene conversion and occurrence patterns.

556 **Supplemental Figure 1.** Distribution of amino acid identity between duplicated genes in  
557 *Oryza* subspecies genomes.

558 **Supplemental Figure 2.** Distribution of synonymous nucleotide substitution percentage (Ps)  
559 between syntenic paralogs in duplicated blocks of *Oryza* subspecies genomes.



- 560 **Supplemental Figure 3.** Relationship between length of blocks on each chromosome and  
561 rate of gene conversion.
- 562 **Supplemental Figure 4.** Histogram of Gene Ontology (GO) statistics for duplicated genes  
563 with and without gene conversion in GJ.
- 564 **Supplemental Figure 5.** Histogram of Gene Ontology (GO) statistics for duplicated genes  
565 with and without gene conversion in XI-MH63.
- 566 **Supplemental Figure 6.** Histogram of Gene Ontology (GO) statistics for duplicated genes  
567 with and without gene conversion in XI-ZS97.
- 568 **Supplemental Figure 7.** Histogram of Gene Ontology (GO) statistics of NBS-LRR genes in  
569 GJ, XI-MH63 and XI-ZS97.
- 570 **Supplemental Table 1.** Number of homologous genes and blocks in GJ, XI-MH63, and  
571 XI-ZS97.
- 572 **Supplemental Table 2.** Identified quartets and gene conversion in GJ, XI-MH63, and  
573 XI-ZS97.
- 574 **Supplemental Table 3.** Gene conversion of quartets in the three rice subspecies genomes.
- 575 **Supplemental Table 4.** Homology of donor locus and acceptor locus in gene conversion.
- 576 **Supplemental Table 5.** Distribution of paralogs and gene conversion GJ, XI-MH63, and  
577 XI-ZS97.
- 578 **Supplemental Table 6.** Relationship between the block number and the gene conversion rate  
579 in GJ, XI-MH63, and XI-ZS97.
- 580 **Supplemental Table 7.** Relationship between the block length and the gene conversion rate  
581 in the three rice subspecies genomes.
- 582 **Supplemental Table 8.** GO analysis of gene conversion and non-gene conversion in GJ,  
583 XI-MH63, and XI-ZS97.
- 584 **Supplemental Table 9.** NBS-LRR gene counts by chromosome in GJ, XI-MH63, and  
585 XI-ZS97.
- 586 **Supplemental Table 10.** GO annotation analysis of NBS-LRR genes in GJ, XI-MH63, and

587 XI-ZS97.

588

## 589 **Competing interests**

590 The authors declare no competing financial interests.

591

## 592 **Acknowledgments**

593 We appreciate the financial support from the China National Science Foundation (3151333 to  
594 JW), Natural Science Foundation of Hebei Province (C20209064 and C2015209069 to JW).

595

## 596 **Legends**

597 **Table 1.** Converted paralogs in GJ and XI genomes (XI-MH63 and XI-ZS97).

598

599 **Table 2.** Relationship between gene physical location and gene conversion

600

601 **Table 3.** Nucleotide substitution rates of quartets in rice subspecies

602

603 **Table 4.** Function comparison of genes subjected to conversion or not in GJ, XI-MH63, and  
604 XI-ZS97.

605

606 **Figure 1.** Genome duplications and conversion patterns in three rice subspecies genomes.  
607 Lines show duplicated gene pairs between chromosomes in three genomes. Colored lines  
608 indicate gene-conversion pairs; grey lines indicate non-gene-conversion pairs. (A) Gene  
609 duplication and gene conversion in GJ. (B) Gene duplication and gene conversion in

610 XI-MH63. (C) Gene duplication and gene conversion in XI-ZS97. (D) Gene duplication and  
611 gene conversion on chromosomes 11 and 12 of GJ, XI-MH63, and XI-ZS97.

612

613 **Figure 2.** Gene conversion events were inferred by construction of homologous gene quartets  
614 and changes in phylogenetic tree topology. (A) Colinear chromosomal segments from two  
615 genomes (O and S), represented by rectangles of different colors. Arrows show genes, and  
616 homologous genes are indicated by the same color. Homologous gene quartets are formed by  
617 paralogous genes O1 and O2 in one genome and their respective orthologs S1 and S2 in the  
618 other genome. (B-E) Squares symbolize a WGD event in the common ancestral genome;  
619 circles symbolize species divergence. (B) The expected phylogenetic relationship of the  
620 homologous genes if no conversion occurs. (C) O2 (an acceptor) is converted by O1 (a  
621 donor). (D) S1 is converted by S2. (e) Both of the above conversions occur.

622

623 **Figure 3.** Evolution of gene conversion. (A) Sequence alignment for a homologous gene  
624 quartet. The nucleotide sequence from 335 to 462 bp of *Zs12g0396.01* and *Zs11g0407.01* has  
625 undergone gene conversion, with *Zs11g0407.01* as the donor. (B) The number of WCV and  
626 PCV events occurring in the three genomes. (C) Evolutionary tree of genes in which gene  
627 conversion has occurred. the numbers at nodes represent bootstrap value. Gene conversion has  
628 occurred in *Mh11g0214.01* and *Oj12g0111700.00*. (D) Gene conversion in species divergence  
629 events.

630

631 **Figure 4.** Distribution of donors and receptors in the genome where gene conversion occurs.  
632 (A) Homologous distribution of donors and acceptors on chromosomes undergoing gene  
633 conversion. Curved lines within the inner circle are formed by 12 chromosomes color coded  
634 to the seven ancestral chromosomes before the WGD event common to grasses (ECH) (Wang  
635 et al., 2015). Intra-loop curves show duplicated gene pairs in GJ. The inner three circles show  
636 the relationships of orthologous gene distribution between the three genomes in which gene  
637 conversion has occurred. The outer three circles show the distribution between the three  
638 genomes undergoing gene conversion, and the inner three circles show paralogous homologs.  
639 Different colors indicate donor (orange) or acceptor (pink) loci, as well as some uncertain loci  
640 (green). (B) Local gene conversion and the distribution of donor and acceptor loci. Pink

641 swatches represent donor loci, orange swatches represent acceptor loci, and green swatches  
642 represent those loci where donor or acceptor status is uncertain. And Zs means XI-ZS97; Mh  
643 means XI-MH63; Oj means GJ.

644

645 **Figure 5.** Relationship between block number and gene conversion rate on each  
646 chromosomes. (A) Relationship between block number on 12 chromosomes and gene  
647 conversion rate on the corresponding chromosomes of GJ, XI-MH63, and XI-ZS97. (B)  
648 Relationship between block number on 8 chromosomes and gene conversion rate on the  
649 corresponding chromosomes after removing the four special chromosomes (homologous  
650 chromosome pair 1-5 and homologous chromosomes pair 11-12).

651

652 **Figure 6.** NBS-LRR gene amplification model in three rice subspecies genomes. (A-C)  
653 Distribution of NBS-LRR genes on 12 chromosomes in GJ, XI-MH63, and XI-ZS97. Green  
654 curved lines within the inner circle connect homologous pairs of NBS-LRR genes on the 12  
655 chromosomes. Green blocks indicate NBS-LRR genes; red lines between NBS-LRR genes  
656 indicate  $Ks < 0.1$ , yellow lines indicate  $0.1 < Ks < 0.2$ , and blue lines indicate  $Ks < 1$ . (D)  
657 Relationship between NBS-LRR genes and gene conversion in regions with more than 1% of  
658 the NBS-LRR genes in the three genomes.

659

---

## 660 Literature Cited

- 661 **Barker MS, Husband BC, Pires JC** (2016) Spreading Winge and flying high: The  
662 evolutionary importance of polyploidy after a century of study. *Am J Bot* **103**:  
663 1139-1145.
- 664 **Bertioli DJ, Cannon SB, Froenicke L, Huang G, Farmer AD, Cannon EK, Liu X, Gao D,**  
665 **Clevenger J, et al.** (2016) The genome sequences of *Arachis duranensis* and  
666 *Arachis ipaensis*, the diploid ancestors of cultivated peanut. *Nat Genet* **48**:  
667 438-446.
- 668 **Bowers JE, Chapman BA, Rong J, Paterson AH** (2003) Unravelling angiosperm genome  
669 evolution by phylogenetic analysis of chromosomal duplication events. *Nature*  
670 **422**: 433-438.
- 671 **Camacho C, Coulouris G, Avagyan V, Ma N, Papadopoulos J, Bealer K, Madden TL**  
672 (2009) BLAST+: architecture and applications. *BMC Bioinformatics* **10**: 421.
- 673 **Chen JM, Cooper DN, Chuzhanova N, Férec C, Patrinos GP** (2007) Gene conversion:  
674 mechanisms, evolution and human disease. *Nat Rev Genet* **8**: 762-775.
- 675 **Cossu RM, Casola C, Giacomello S, Vidalis A, Scofield DG, Zuccolo A** (2017) LTR  
676 retrotransposons show low levels of unequal recombination and high rates of  
677 intraelement gene conversion in large plant genomes. *Genome Biol Evol* **9**:  
678 3449-3462.
- 679 **Daugherty MD, Zanders SE** (2019) Gene conversion generates evolutionary novelty  
680 that fuels genetic conflicts. *Current Opinion in Genetics & Development* **58-59**:  
681 49-54.
- 682 **Divya B, Biswas A, Robin S, Rabindran R, Joel AJ** (2014) Gene interactions and  
683 genetics of blast resistance and yield attributes in rice (*Oryza sativa* L.). *J Genet*  
684 **93**: 415-424.
- 685 **Eddy SR** (2011) Accelerated profile HMM searches. *PLoS Comput Biol* **7**: e1002195.
- 686 **Finet C, Slavik K, Pu J, Carroll SB, Chung H** (2019) Birth-and-death evolution of the  
687 Fatty acyl-CoA reductase (FAR) gene family and diversification of cuticular  
688 hydrocarbon synthesis in drosophila. *Genome Biol Evol* **11**: 1541-1551.
- 689 **Frawley LE, Orr-Weaver TL** (2015) Polyploidy. *Current Biology* **25**: R353-R358.
- 690 **Gardiner LJ, Wingen LU, Bailey P, Joynson R, Brabbs T, Wright J, Higgins JD, Hall N,**  
691 **Griffiths S, et al.** (2019) Analysis of the recombination landscape of hexaploid  
692 bread wheat reveals genes controlling recombination and gene conversion  
693 frequency. *Genome Biol* **20**: 69.

- 
- 694 **Godiard L, Grant MR, Dietrich RA, Kiedrowski S, Dangl JL** (1994) Perception and  
695 response in plant disease resistance. *Curr Opin Genet Dev* **4**: 662-671.
- 696 **Goff SA, Ricke D, Lan TH, Presting G, Wang R, Dunn M, Glazebrook J, Sessions A,**  
697 **Oeller P, et al.** (2002) A draft sequence of the rice genome (*Oryza sativa* L. ssp.  
698 *japonica*). *Science* **296**: 92-100.
- 699 **Guo H, Lee TH, Wang X, Paterson AH** (2013) Function relaxation followed by  
700 diversifying selection after whole-genome duplication in flowering plants. *Plant*  
701 *Physiol* **162**: 769-778.
- 702 **Harpak A, Lan X, Gao Z, Pritchard JK** (2017) Frequent nonallelic gene conversion on  
703 the human lineage and its effect on the divergence of gene duplicates. *Proc Natl*  
704 *Acad Sci U S A* **114**: 12779-12784.
- 705 **Huang X, Wei X, Sang T, Zhao Q, Feng Q, Zhao Y, Li C, Zhu C, Lu T, et al.** (2010)  
706 Genome-wide association studies of 14 agronomic traits in rice landraces. *Nat*  
707 *Genet* **42**: 961-967.
- 708 **Jacquemin J, Chaparro C, Laudié M, Berger A, Gavory F, Goicoechea JL, Wing RA,**  
709 **Cooke R** (2011) Long-range and targeted ectopic recombination between the  
710 two homeologous chromosomes 11 and 12 in *Oryza* species. *Mol Biol Evol* **28**:  
711 3139-3150.
- 712 **Jacquemin J, Laudié M, Cooke R** (2009) A recent duplication revisited: phylogenetic  
713 analysis reveals an ancestral duplication highly-conserved throughout the *Oryza*  
714 genus and beyond. *BMC Plant Biol* **9**: 146.
- 715 **Jang CS, Yim WC, Moon JC, Hung JH, Lee TG, Lim SD, Cho SH, Lee KK, Kim W, et al.**  
716 (2008) Evolution of non-specific lipid transfer protein (nsLTP) genes in the  
717 Poaceae family: their duplication and diversity. *Mol Genet Genomics* **279**:  
718 481-497.
- 719 **Jiao Y, Wickett NJ, Ayyampalayam S, Chanderbali AS, Landherr L, Ralph PE, Tomsho**  
720 **LP, Hu Y, Liang H, et al.** (2011) Ancestral polyploidy in seed plants and  
721 angiosperms. *Nature* **473**: 97-100.
- 722 **Jones P, Binns D, Chang H-Y, Fraser M, Li W, Mcanulla C, Mcwilliam H, Maslen J,**  
723 **Mitchell A, et al.** (2014) InterProScan 5: genome-scale protein function  
724 classification. *Bioinformatics* **30**: 1236-1240.
- 725 **Jung CG, Lim SD, Hwang SG, Jang CS** (2012) Molecular characterization and concerted  
726 evolution of two genes encoding RING-C2 type proteins in rice. *Gene* **505**: 9-18.
- 727 **Keen NT** (1992) The molecular biology of disease resistance. *Plant Mol Biol* **19**:  
728 109-122.

- 
- 729 **Kim H, Hurwitz B, Yu Y, Collura K, Gill N, Sanmiguel P, Mullikin JC, Maher C, Nelson**  
730 **W, et al.** (2008) Construction, alignment and analysis of twelve framework  
731 physical maps that represent the ten genome types of the genus *Oryza*. *Genome*  
732 *Biology* **9**: R45.
- 733 **Koszul R, Fischer G** (2009) A prominent role for segmental duplications in modeling  
734 Eukaryotic genomes. *Comptes Rendus Biologies* **332**: 254-266.
- 735 **Kurosawa K, Ohta K** (2011) Genetic diversification by somatic gene conversion. *Genes*  
736 (Basel) **2**: 48-58.
- 737 **Larkin MA, Blackshields G, Brown N, Chenna R, Mcgettigan P, Mcwilliam H,**  
738 **Valentin F, Wallace IMW, Wilm A, et al.** (2007) Clustal W and Clustal X version  
739 2.0. *Bioinformatics* **23**: 2947-2948.
- 740 **Li X, Chen Z, Zhang G, Lu H, Qin P, Qi M, Yu Y, Jiao B, Zhao X, et al.** (2020) Analysis of  
741 genetic architecture and favorable allele usage of agronomic traits in a large  
742 collection of Chinese rice accessions. *Sci China Life Sci* **63**: 1688-1702.
- 743 **Liu C, Wang J, Sun P, Yu J, Meng F, Zhang Z, Guo H, Wei C, Li X, et al.** (2020)  
744 Illegitimate recombination between homeologous genes in wheat genome. *Front*  
745 *Plant Sci* **11**: 1076.
- 746 **Mao D, Yu H, Liu T, Yang G, Xing Y** (2011) Two complementary recessive genes in  
747 duplicated segments control etiolation in rice. *Theor Appl Genet* **122**: 373-383.
- 748 **Ming R, Vanburen R, Wai CM, Tang H, Schatz MC, Bowers JE, Lyons E, Wang ML,**  
749 **Chen J, et al.** (2015) The pineapple genome and the evolution of CAM  
750 photosynthesis. *Nat Genet* **47**: 1435-1442.
- 751 **Murat F, Armero A, Pont C, Klopp C, Salse J** (2017) Reconstructing the genome of the  
752 most recent common ancestor of flowering plants. *Nat Genet* **49**: 490-496.
- 753 **Murat F, Xu JH, Tannier E, Abrouk M, Guilhot N, Pont C, Messing J, Salse J** (2010)  
754 Ancestral grass karyotype reconstruction unravels new mechanisms of genome  
755 shuffling as a source of plant evolution. *Genome Res* **20**: 1545-1557.
- 756 **Murat F, Zhang R, Guizard S, Flores R, Armero A, Pont C, Steinbach D, Quesneville H,**  
757 **Cooke R, et al.** (2014) Shared subgenome dominance following polyploidization  
758 explains grass genome evolutionary plasticity from a seven protochromosome  
759 ancestor with 16K protogenes. *Genome Biol Evol* **6**: 12-33.
- 760 **Nawrocki EP, Eddy SR** (2013) Infernal 1.1: 100-fold faster RNA homology searches.  
761 *Bioinformatics* **29**: 2933-2935.
- 762 **Okuyama Y, Kanzaki H, Abe A, Yoshida K, Tamiru M, Saitoh H, Fujibe T, Matsumura**  
763 **H, Shenton M, et al.** (2011) A multifaceted genomics approach allows the



- 764 isolation of the rice Pia-blast resistance gene consisting of two adjacent  
765 NBS-LRR protein genes. *Plant J* **66**: 467-479.
- 766 **Paterson AH, Bowers JE, Bruggmann R, Dubchak I, Grimwood J, Gundlach H,**  
767 **Haberer G, Hellsten U, Mitros T, et al.** (2009) The *Sorghum bicolor* genome and  
768 the diversification of grasses. *Nature* **457**: 551-556.
- 769 **Paterson AH, Bowers JE, Chapman BA** (2004) Ancient polyploidization predating  
770 divergence of the cereals, and its consequences for comparative genomics. *Proc*  
771 *Natl Acad Sci U S A* **101**: 9903-9908.
- 772 **Paterson AH, Wendel JF, Gundlach H, Guo H, Jenkins J, Jin D, Llewellyn D,**  
773 **Showmaker KC, Shu S, et al.** (2012) Repeated polyploidization of *Gossypium*  
774 genomes and the evolution of spinnable cotton fibres. *Nature* **492**: 423-427.
- 775 **Puchta H, Dujon B, Hohn B** (1996) Two different but related mechanisms are used in  
776 plants for the repair of genomic double-strand breaks by homologous  
777 recombination. *Proc Natl Acad Sci U S A* **93**: 5055-5060.
- 778 **Ratnaparkhe MB, Wang X, Li J, Compton RO, Rainville LK, Lemke C, Kim C, Tang H,**  
779 **Paterson AH** (2011) Comparative analysis of peanut NBS-LRR gene clusters  
780 suggests evolutionary innovation among duplicated domains and erosion of  
781 gene microsynteny. *New Phytol* **192**: 164-178.
- 782 **Ricachenevsky FK, Sperotto RA, Menguer PK, Sperb ER, Lopes KL, Fett JP** (2011)  
783 ZINC-INDUCED FACILITATOR-LIKE family in plants: lineage-specific expansion in  
784 monocotyledons and conserved genomic and expression features among rice  
785 (*Oryza sativa*) paralogs. *BMC Plant Biol* **11**: 20.
- 786 **Rooney AP** (2004) Mechanisms underlying the evolution and maintenance of  
787 functionally heterogeneous 18S rRNA genes in Apicomplexans. *Mol Biol Evol* **21**:  
788 1704-1711.
- 789 **Stein JC, Yu Y, Copetti D, Zwickl DJ, Zhang L, Zhang C, Chougule K, Gao D, Iwata A, et**  
790 **al.** (2018) Genomes of 13 domesticated and wild rice relatives highlight genetic  
791 conservation, turnover and innovation across the genus *Oryza*. *Nature Genetics*  
792 **50**: 285-296.
- 793 **Sweeney M, Mccouch S** (2007) The complex history of the domestication of rice. *Ann*  
794 *Bot* **100**: 951-957.
- 795 **Tanaka T, Antonio BA, Kikuchi S, Matsumoto T, Nagamura Y, Numa H, Sakai H, Wu J,**  
796 **Itoh T, et al.** (2008) The Rice Annotation Project Database (RAP-DB): 2008  
797 update. *Nucleic Acids Res* **36**: D1028-1033.
- 798 **Tang H, Bowers JE, Wang X, Paterson AH** (2010) Angiosperm genome comparisons  
799 reveal early polyploidy in the monocot lineage. *Proc Natl Acad Sci U S A* **107**:



- 
- 800 472-477.
- 801 **Taylor JS, Raes J** (2004) Duplication and divergence: the evolution of new genes and old  
802 ideas. *Annu Rev Genet* **38**: 615-643.
- 803 **Wang HW, Hwang S-G, Karuppanapandian T, Liu A, Kim W, Jang CS** (2012) Insight  
804 into the molecular evolution of non-specific lipid transfer proteins via  
805 comparative analysis between rice and sorghum. *DNA Res* **19**: 179-194.
- 806 **Wang J, Sun P, Li Y, Liu Y, Yang N, Yu J, Ma X, Sun S, Xia R, et al.** (2018a) An overlooked  
807 paleotetraploidization in cucurbitaceae. *Mol Biol Evol* **35**: 16-26.
- 808 **Wang J, Sun P, Li Y, Liu Y, Yu J, Ma X, Sun S, Yang N, Xia R, et al.** (2017) Hierarchically  
809 Aligning 10 legume genomes establishes a family-level genomics Platform. *Plant*  
810 *Physiol* **174**: 284-300.
- 811 **Wang W, Mauleon R, Hu Z, Chebotarov D, Tai S, Wu Z, Li M, Zheng T, Fuentes RR, et**  
812 **al.** (2018b) Genomic variation in 3,010 diverse accessions of Asian cultivated rice.  
813 *Nature* **557**: 43-49.
- 814 **Wang X, Shi X, Hao B, Ge S, Luo J** (2005) Duplication and DNA segmental loss in the  
815 rice genome: implications for diploidization. *New Phytol* **165**: 937-946.
- 816 **Wang X, Tang H, Bowers JE, Feltus FA, Paterson AH** (2007) Extensive concerted  
817 evolution of rice paralogs and the road to regaining independence. *Genetics* **177**:  
818 1753-1763.
- 819 **Wang X, Tang H, Bowers JE, Paterson AH** (2009) Comparative inference of illegitimate  
820 recombination between rice and sorghum duplicated genes produced by  
821 polyploidization. *Genome Res* **19**: 1026-1032.
- 822 **Wang X, Tang H, Paterson AH** (2011) Seventy million years of concerted evolution of a  
823 homoeologous chromosome pair, in parallel, in major Poaceae lineages. *Plant Cell*  
824 **23**: 27-37.
- 825 **Wang X, Wang J, Jin D, Guo H, Lee TH, Liu T, Paterson AH** (2015) Genome alignment  
826 spanning major poaceae lineages reveals heterogeneous evolutionary rates and  
827 alters inferred dates for key evolutionary events. *Mol Plant* **8**: 885-898.
- 828 **Wang XY, Paterson AH** (2011) Gene conversion in angiosperm genomes with an  
829 emphasis on genes duplicated by polyploidization. *Genes (Basel)* **2**: 1-20.
- 830 **Wang Z, Wang J, Pan Y, Lei T, Ge W, Wang L, Zhang L, Li Y, Zhao K, et al.** (2019)  
831 Reconstruction of evolutionary trajectories of chromosomes unraveled  
832 independent genomic repatterning between Triticeae and Brachypodium. *BMC*  
833 *Genomics* **20**: 180.
- 834 **Wicker T, Wing RA, Schubert I** (2015) Recurrent sequence exchange between

- 835 homeologous grass chromosomes. *Plant J* **84**: 747-759.
- 836 **Woodhouse MR, Schnable JC, Pedersen BS, Lyons E, Lisch D, Subramaniam S,**  
837 **Freeling M** (2010) Following tetraploidy in maize, a short deletion mechanism  
838 removed genes preferentially from one of the two homologs. *PLoS Biol* **8**:  
839 e1000409.
- 840 **Wu S, Han B, Jiao Y** (2020) Genetic contribution of paleopolyploidy to adaptive  
841 evolution in angiosperms. *Mol Plant* **13**: 59-71.
- 842 **Ye J, Zhang Y, Cui H, Liu J, Wu Y, Cheng Y, Xu H, Huang X, Li S, et al.** (2018) WEGO 2.0:  
843 a web tool for analyzing and plotting GO annotations, 2018 update. *Nucleic Acids*  
844 *Res* **46**: w71-w75.
- 845 **Yu J, Hu S, Wang J, Wong GK, Li S, Liu B, Deng Y, Dai L, Zhou Y, et al.** (2002) A draft  
846 sequence of the rice genome (*Oryza sativa* L. ssp. *indica*). *Science* **296**: 79-92.
- 847 **Yu J, Zhao M, Wang X, Tong C, Huang S, Tehrim S, Liu Y, Hua W, Liu S** (2013) Bolbase:  
848 a comprehensive genomics database for *Brassica oleracea*. *BMC Genomics* **14**:  
849 664.
- 850 **Zhang H, Zhang CQ, Sun ZZ, Yu W, Gu MH, Liu QQ, Li YS** (2011) A major locus qS12,  
851 located in a duplicated segment of chromosome 12, causes spikelet sterility in an  
852 indica-japonica rice hybrid. *Theor Appl Genet* **123**: 1247-1256.
- 853 **Zhang J, Chen LL, Xing F, Kudrna DA, Yao W, Copetti D, Mu T, Li W, Song JM, et al.**  
854 (2016) Extensive sequence divergence between the reference genomes of two  
855 elite indica rice varieties Zhenshan 97 and Minghui 63. *Proc Natl Acad Sci U S A*  
856 **113**: E5163-5171.
- 857 **Zhang QJ, Zhu T, Xia EH, Shi C, Liu YL, Zhang Y, Liu Y, Jiang WK, Zhao YJ, et al.** (2014)  
858 Rapid diversification of five *Oryza* AA genomes associated with rice adaptation.  
859 *Proc Natl Acad Sci U S A* **111**: E4954-4962.
- 860 **Zhuang W, Chen H, Yang M, Wang J, Pandey MK, Zhang C, Chang W-C, Zhang L,**  
861 **Zhang X, et al.** (2019) The genome of cultivated peanut provides insight into  
862 legume karyotypes, polyploid evolution and crop domestication. *Nature Genetics*  
863 **51**: 865-876.

864 **Table 1.** Converted paralogs in GJ and XI genomes (XI-MH63 and XI-ZS97).

|                          | GJ           | XI-MH63               |                       |              | XI-ZS97               |                       |              |
|--------------------------|--------------|-----------------------|-----------------------|--------------|-----------------------|-----------------------|--------------|
|                          |              | Period A <sup>1</sup> | Period B <sup>2</sup> | Total        | Period A <sup>1</sup> | Period B <sup>2</sup> | Total        |
| Paralogs                 | 3332         |                       | 3322                  |              | 3254                  |                       |              |
| WCV-I                    | 11 (2.76%)   | 7 (1.72%)             | 1 (1.28%)             | 8 (1.72%)    | 7 (1.79%)             | 1 (1.27%)             | 8 (1.71%)    |
| WCV-II                   | 168 (42.21%) | 173 (42.51%)          | 1 (1.28%)             | 174 (37.34%) | 175 (44.76%)          | 2 (2.53%)             | 177 (37.82%) |
| PCV                      | 259 (65.08%) | 250 (61.43%)          | 77 (98.72%)           | 312 (66.95%) | 251 (61.22%)          | 77 (97.47%)           | 310 (66.24%) |
| On chromosomes 11 and 12 | 64 (16.08%)  | 63 (15.48%)           | 17 (21.79%)           | 76 (16.31%)  | 57 (14.58%)           | 8 (10.13%)            | 64 (13.68%)  |
| All gene conversions     | 398          | 407                   | 78                    | 466          | 391                   | 79                    | 468          |
| Conversion rate          | 0.119        | 0.123                 | 0.023                 | 0.140        | 0.120                 | 0.024                 | 0.144        |

865 Note: <sup>1</sup>Gene conversion events occurred after the formation of the XI subspecies but before the formation of XI varieties XI-MH63 and XI-ZS97.

866 <sup>2</sup>Gene conversion events occurred after the formation of XI varieties (XI-MH63 and XI-ZS97).

867

**Table 2.** Relationship between gene physical location and gene conversion

| Distance to telomere | <2 Mbp       | 2-4 Mbp     | 4-6 Mbp     | 6-8 Mbp     | 8-10 Mbp   | >10 Mbp      | Total        |
|----------------------|--------------|-------------|-------------|-------------|------------|--------------|--------------|
| GJ                   |              |             |             |             |            |              |              |
| All converted        | 119 (17.20%) | 60 (13.02%) | 71 (15.78%) | 25 (8.42%)  | 12 (8.45%) | 478 (11.16%) | 765 (12.09%) |
| Paralogous genes     | 692          | 461         | 450         | 297         | 142        | 4283         | 6326         |
| XI-MH63              |              |             |             |             |            |              |              |
| All converted        | 148 (25.34%) | 74 (20.00%) | 68 (23.78%) | 35 (18.52%) | 8 (7.92%)  | 576 (17.11%) | 909 (18.57%) |
| Paralogous genes     | 584          | 370         | 286         | 189         | 101        | 3366         | 4896         |
| XI-ZS97              |              |             |             |             |            |              |              |
| All converted        | 139 (20.59%) | 76 (16.03%) | 70 (18.57%) | 37 (14.98%) | 12 (9.16%) | 578 (16.14%) | 912 (16.62%) |
| Paralogous genes     | 675          | 474         | 377         | 247         | 131        | 3581         | 5486         |

869

870 **Table 3.** Nucleotide substitution rates of quartets in rice subspecies

| Paralog            | XI-MH63                |                        |       | XI-ZS97                |                        |       | GJ                     |                        |       |
|--------------------|------------------------|------------------------|-------|------------------------|------------------------|-------|------------------------|------------------------|-------|
|                    | Pn                     | Ps                     | Pn/Ps | Pn                     | Ps                     | Pn/Ps | Pn                     | Ps                     | Pn/Ps |
| Gene conversion    | 0.180                  | 0.444                  | 0.405 | 0.179                  | 0.448                  | 0.400 | 0.198                  | 0.456                  | 0.434 |
| No gene conversion | 0.234                  | 0.486                  | 0.481 | 0.235                  | 0.486                  | 0.484 | 0.253                  | 0.509                  | 0.497 |
| P-value            | $1.82 \times 10^{-18}$ | $8.73 \times 10^{-9}$  | -     | $7.81 \times 10^{-20}$ | $1.25 \times 10^{-7}$  | -     | $3.71 \times 10^{-26}$ | $8.00 \times 10^{-20}$ |       |
| Orthologs          | XI-MH63 vs. GJ         |                        |       | XI-ZS97 vs. GJ         |                        |       | XI-MH63 vs. XI-ZS97    |                        |       |
|                    | Pn                     | Ps                     | Pn/Ps | Pn                     | Ps                     | Pn/Ps | Pn                     | Ps                     | Pn/Ps |
| Gene conversion    | 0.049                  | 0.076                  | 0.645 | 0.053                  | 0.085                  | 0.624 | 0.055                  | 0.100                  | 0.550 |
| No gene conversion | 0.023                  | 0.036                  | 0.639 | 0.025                  | 0.038                  | 0.658 | 0.014                  | 0.022                  | 0.636 |
| P-value            | $5.61 \times 10^{-19}$ | $9.63 \times 10^{-23}$ | -     | $1.76 \times 10^{-21}$ | $1.23 \times 10^{-27}$ |       | $6.25 \times 10^{-20}$ | $2.58 \times 10^{-31}$ | -     |

871

872 **Table 4.** Function comparison of genes subjected to conversion or not in GJ, XI-MH63, and XI-ZS97.

| GO level2          | GJ                         |         | XI-MH63                    |         | XI-ZS97                    |         |
|--------------------|----------------------------|---------|----------------------------|---------|----------------------------|---------|
|                    | cv vs. non-cv <sup>1</sup> | P-value | cv vs. non-cv <sup>1</sup> | P-value | cv vs. non-cv <sup>1</sup> | P-value |
| Catalytic activity | 31.4:25.5                  | 0.001   | 32.5:26.4                  | <0.001  | 33.6:26.1                  | <0.001  |
| Binding            | 38.8:35.5                  | 0.083   | 39.9:37.7                  | 0.199   | 39.6:38.1                  | 0.412   |
| Metabolic process  | 37.7:27.7                  | <0.001  | 36.8:29.6                  | <0.001  | 37.4:29.4                  | <0.001  |
| Cellular process   | 28.9:24.0                  | 0.003   | 28.0:26.2                  | 0.262   | 27.4:25.8                  | 0.32    |

873 Note: <sup>1</sup>Proportion of converted genes vs. proportion of non-converted genes.



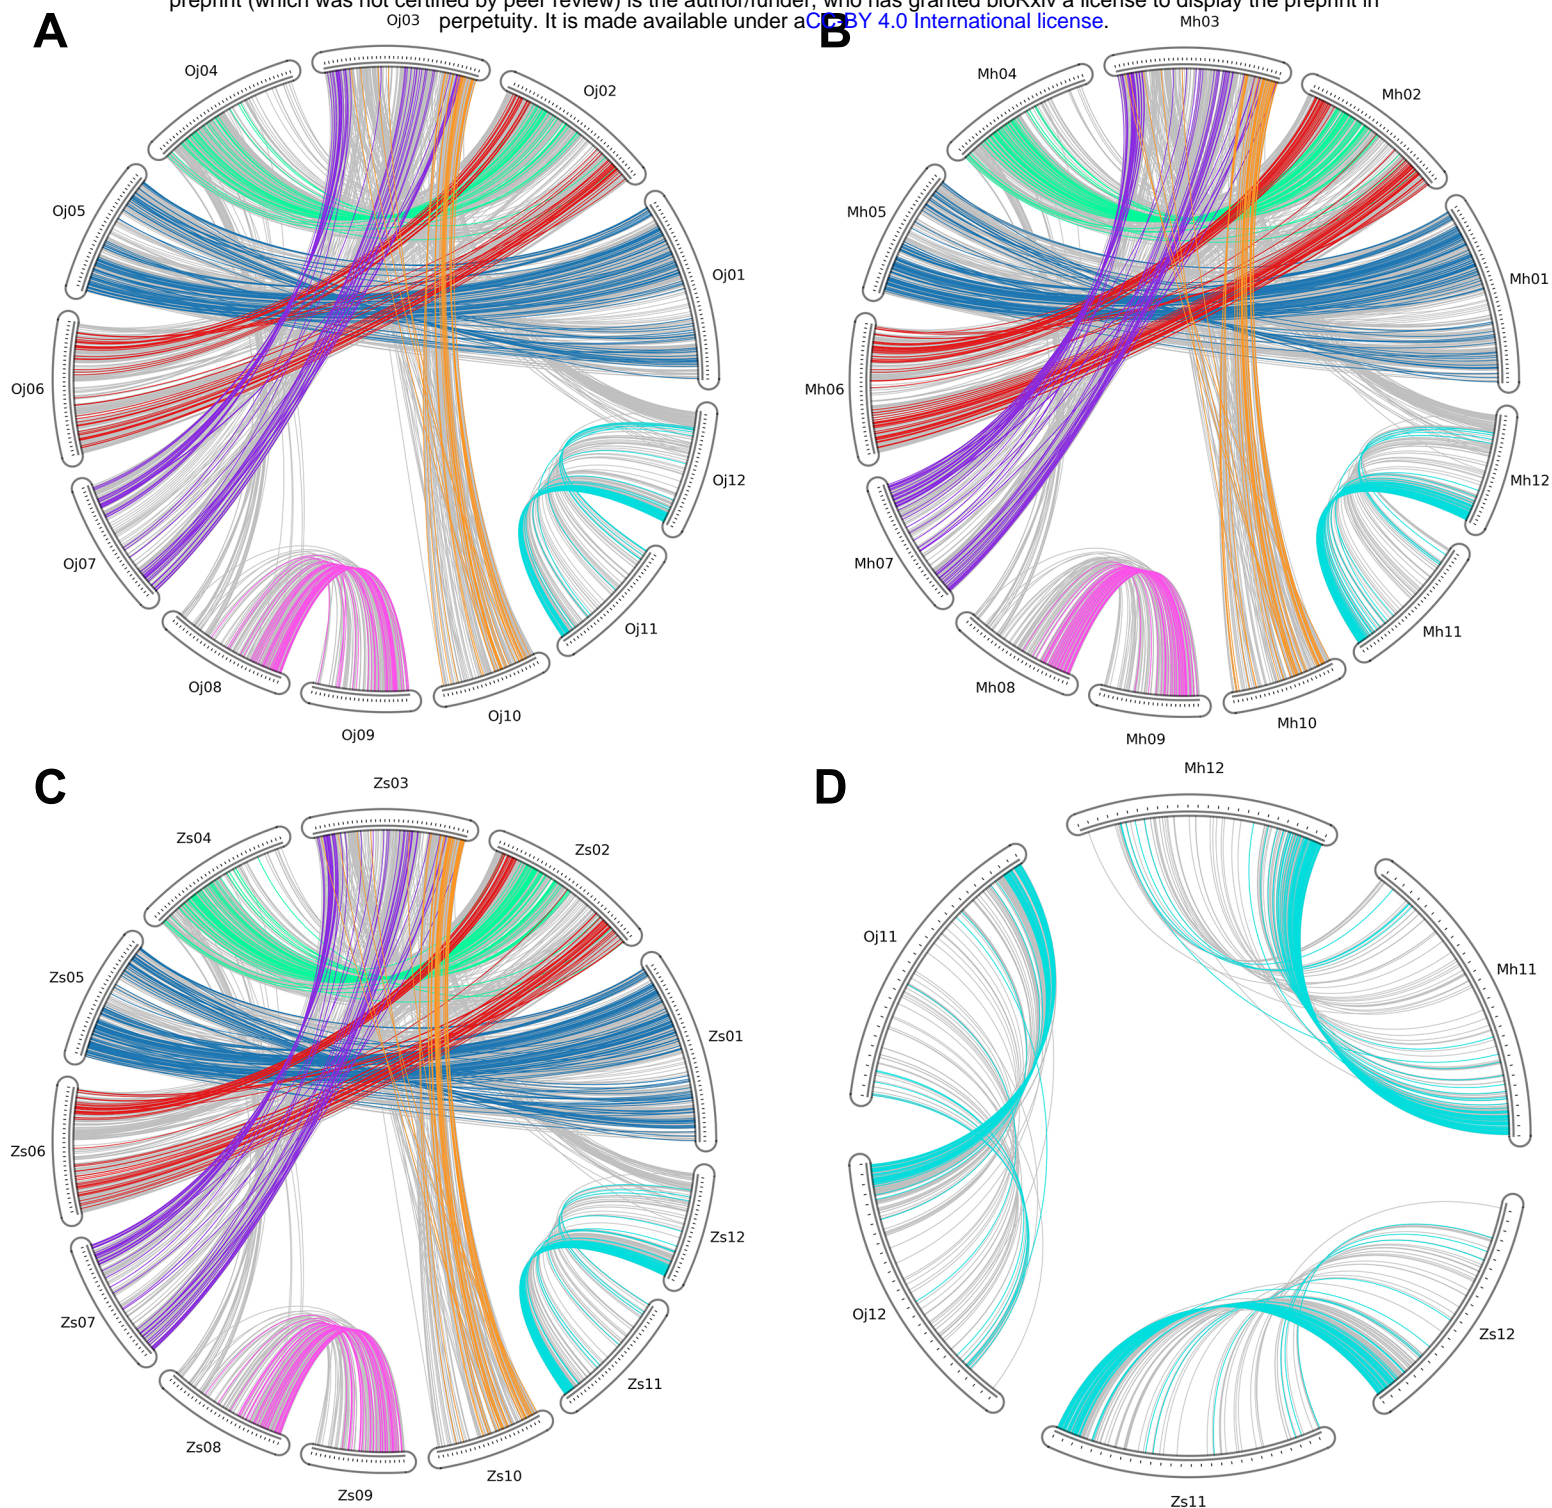

**Figure 1.** Genome duplications and conversion patterns in three rice subspecies genomes. Lines show duplicated gene pairs between chromosomes in three genomes. Colored lines indicate gene-conversion pairs; grey lines indicate non-gene-conversion pairs. (A) Gene duplication and gene conversion in GJ. (B) Gene duplication and gene conversion in XI-MH63. (C) Gene duplication and gene conversion in XI-ZS97. (D) Gene duplication and gene conversion on chromosomes 11 and 12 of GJ, XI-MH63, and XI-ZS97.

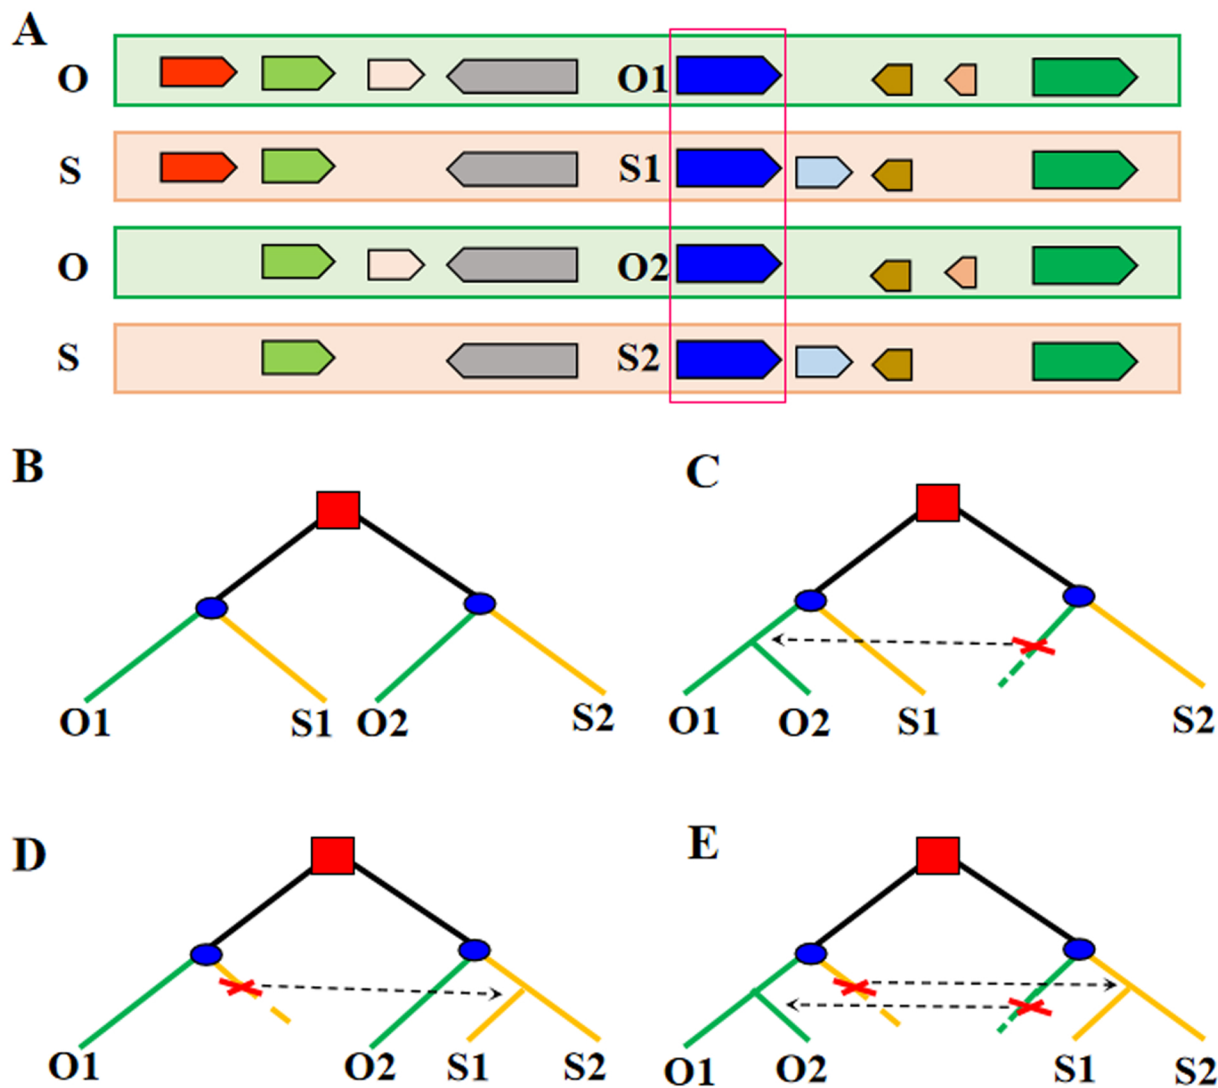

**Figure 2.** Gene conversion events were inferred by construction of homologous gene quartets and changes in phylogenetic tree topology. (A) Colinear chromosomal segments from two genomes (O and S), represented by rectangles of different colors. Arrows show genes, and homologous genes are indicated by the same color. Homologous gene quartets are formed by paralogous genes O1 and O2 in one genome and their respective orthologs S1 and S2 in the other genome. (B-E) Squares symbolize a WGD event in the common ancestral genome; circles symbolize species divergence. (D) The expected phylogenetic relationship of the homologous genes if no conversion occurs. (C) O2 (an acceptor) is converted by O1 (a donor). (D) S1 is converted by S2. (E) Both of the above conversions occur.



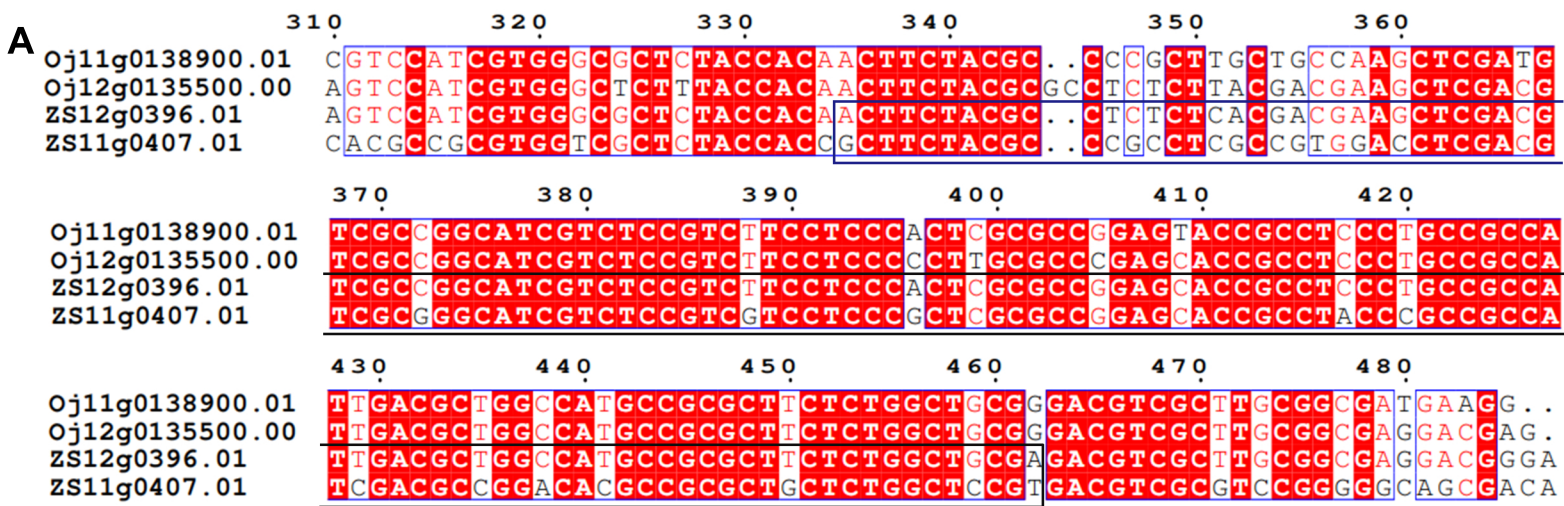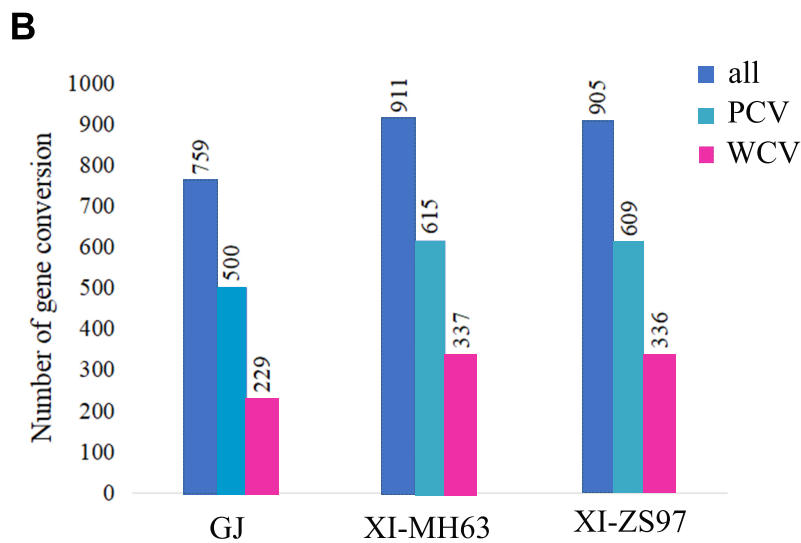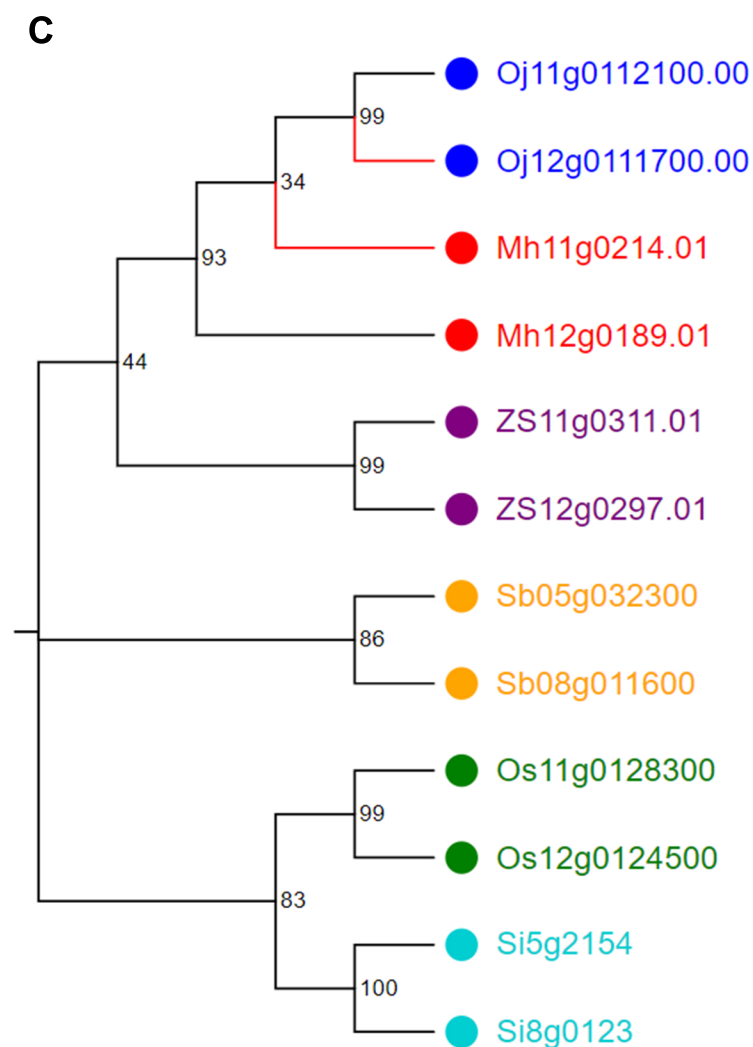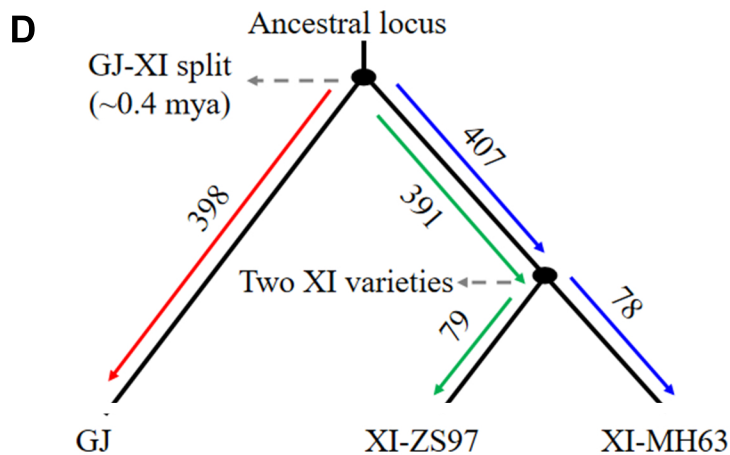

**Figure 3.** Evolution of gene conversion. (A) Sequence alignment for a homologous gene quartet. The nucleotide sequence from 335 to 462 bp of Zs12g0396.01 and Zs11g0407.01 has undergone gene conversion, with Zs11g0407.01 as the donor. (B) The number of WCV and PCV events occurring in the three genomes. (C) Evolutionary tree of genes in which gene conversion has occurred. the numbers at nodes represent bootstrap value. Gene conversion has occurred in Mh11g0214.01 and Oj12g0111700.00. (D) Gene conversion in species divergence events.

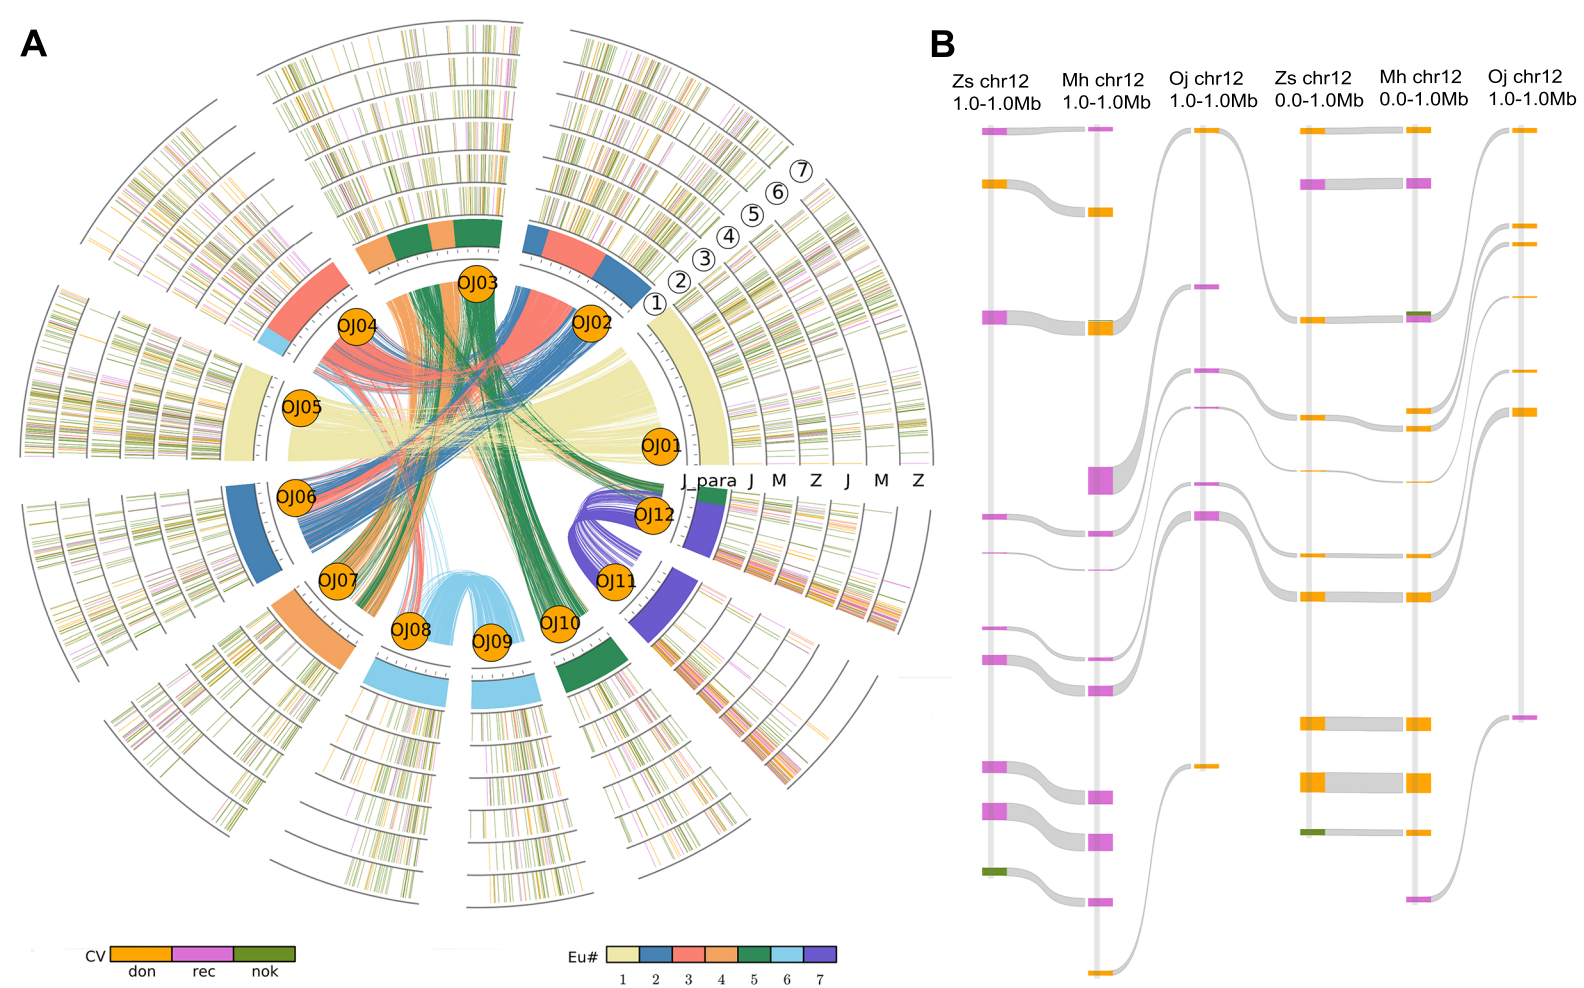

**Figure 4.** Distribution of donors and receptors in the genome where gene conversion occurs. (A) Homologous distribution of donors and acceptors on chromosomes undergoing gene conversion. Curved lines within the inner circle are formed by 12 chromosomes color coded to the seven ancestral chromosomes before the WGD event common to grasses (ECH) (Wang et al., 2015). Intra-loop curves show duplicated gene pairs in GJ. The inner three circles show the relationships of orthologous gene distribution between the three genomes in which gene conversion has occurred. The outer three circles show the distribution between the three genomes undergoing gene conversion, and the inner three circles show paralogous homologs. Different colors indicate donor (orange) or acceptor (pink) loci, as well as some uncertain loci (green). (B) Local gene conversion and the distribution of donor and acceptor loci. Pink swatches represent donor loci, orange swatches represent acceptor loci, and green swatches represent those loci where donor or acceptor status is uncertain. And Zs means XI-ZS97; Mh means XI-MH63; Oj means GJ.

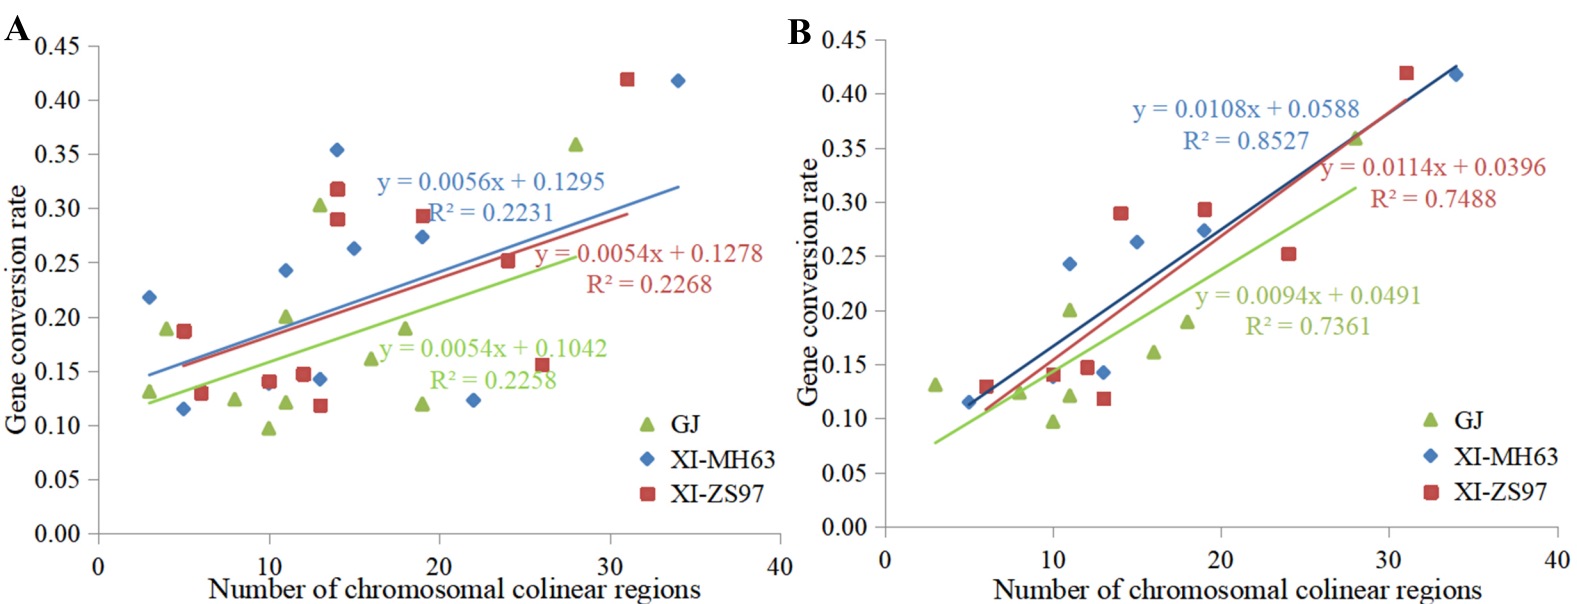

**Figure 5.** Relationship between block number and gene conversion rate on each chromosome. (A) Relationship between block number on 12 chromosomes and gene conversion rate on the corresponding chromosomes of GJ, XI-MH63, and XI-ZS97. (B) Relationship between block number on 8 chromosomes and gene conversion rate on the corresponding chromosomes after removing the four special chromosomes (homologous chromosome pair 1-5 and homologous chromosomes pair 11-12).



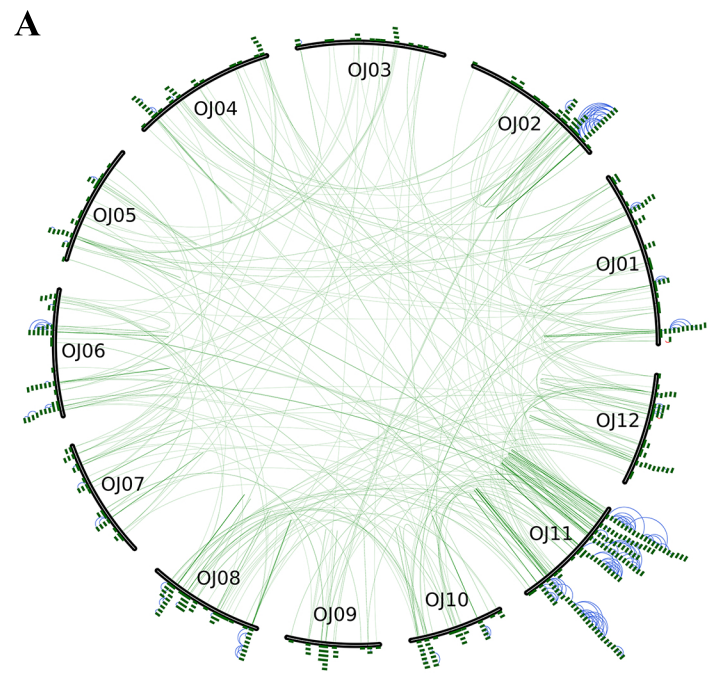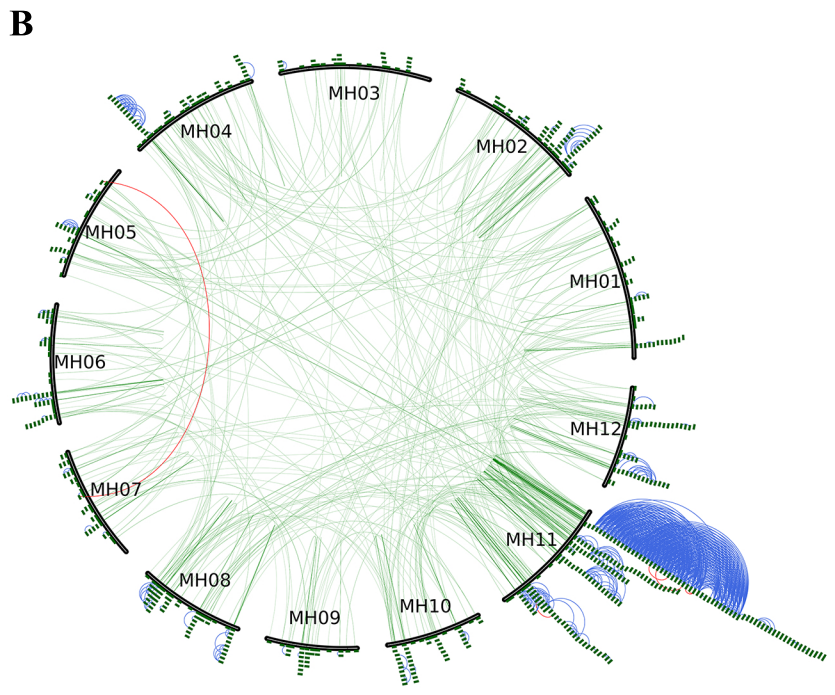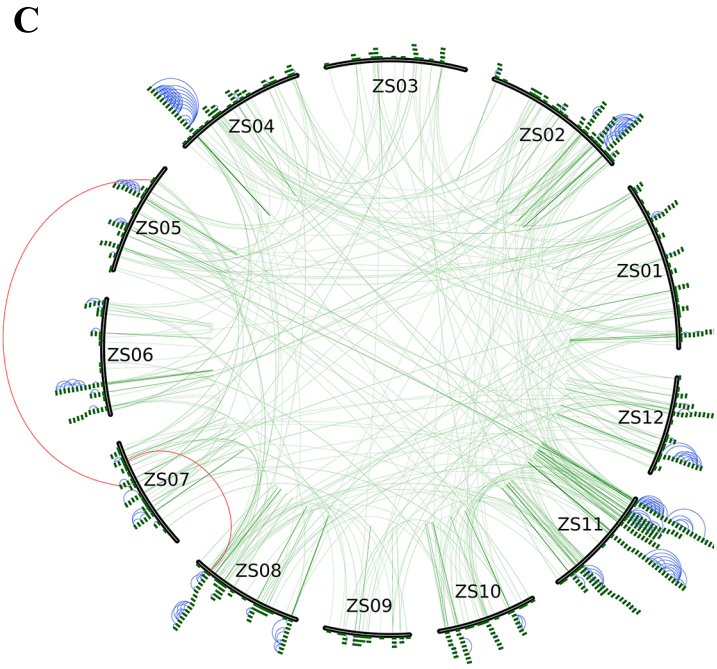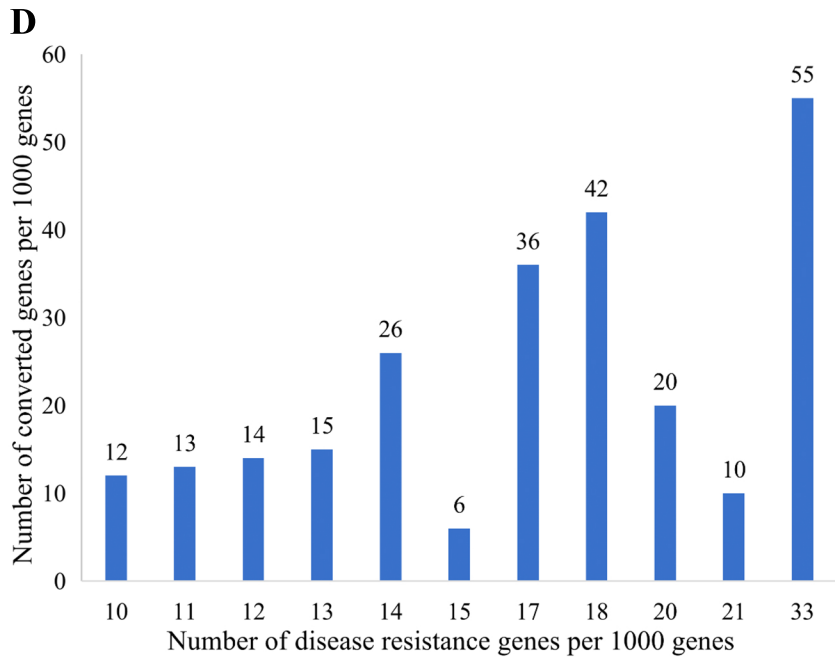

**Figure 6.** NBS-LRR gene amplification model in three rice subspecies genomes. (A-C) Distribution of NBS-LRR genes on 12 chromosomes in GJ, XI-MH63, and XI-ZS97. Green curved lines within the inner circle connect homologous pairs of NBS-LRR genes on the 12 chromosomes. Green blocks indicate NBS-LRR genes; red lines between NBS-LRR genes indicate  $K_s < 0.1$ , yellow lines indicate  $0.1 < K_s < 0.2$ , and blue lines indicate  $K_s < 1$ . (D) Relationship between NBS-LRR genes and gene conversion in regions with more than 1% of the NBS-LRR genes in the three genomes.

## Parsed Citations

**Barker MS, Husband BC, Pires JC (2016) Spreading Winge and flying high: The evolutionary importance of polyploidy after a century of study. *Am J Bot* 103: 1139-1145.**

Google Scholar: [Author Only](#) [Title Only](#) [Author and Title](#)

**Bertioli DJ, Cannon SB, Froenicke L, Huang G, Farmer AD, Cannon EK, Liu X, Gao D, Clevenger J, et al. (2016) The genome sequences of *Arachis duranensis* and *Arachis ipaensis*, the diploid ancestors of cultivated peanut. *Nat Genet* 48: 438-446.**

Google Scholar: [Author Only](#) [Title Only](#) [Author and Title](#)

**Bowers JE, Chapman BA, Rong J, Paterson AH (2003) Unravelling angiosperm genome evolution by phylogenetic analysis of chromosomal duplication events. *Nature* 422: 433-438.**

Google Scholar: [Author Only](#) [Title Only](#) [Author and Title](#)

**Camacho C, Coulouris G, Avagyan V, Ma N, Papadopoulos J, Bealer K, Madden TL (2009) BLAST+: architecture and applications. *BMC Bioinformatics* 10: 421.**

Google Scholar: [Author Only](#) [Title Only](#) [Author and Title](#)

**Chen JM, Cooper DN, Chuzhanova N, Férec C, Patrinos GP (2007) Gene conversion: mechanisms, evolution and human disease. *Nat Rev Genet* 8: 762-775.**

Google Scholar: [Author Only](#) [Title Only](#) [Author and Title](#)

**Cossu RM, Casola C, Giacomello S, Vidalis A, Scofield DG, Zuccolo A (2017) LTR retrotransposons show low levels of unequal recombination and high rates of intraelement gene conversion in large plant genomes. *Genome Biol Evol* 9: 3449-3462.**

Google Scholar: [Author Only](#) [Title Only](#) [Author and Title](#)

**Daugherty MD, Zanders SE (2019) Gene conversion generates evolutionary novelty that fuels genetic conflicts. *Current Opinion in Genetics & Development* 58-59: 49-54.**

Google Scholar: [Author Only](#) [Title Only](#) [Author and Title](#)

**Divya B, Biswas A, Robin S, Rabindran R, Joel AJ (2014) Gene interactions and genetics of blast resistance and yield attributes in rice (*Oryza sativa* L.). *J Genet* 93: 415-424.**

Google Scholar: [Author Only](#) [Title Only](#) [Author and Title](#)

**Eddy SR (2011) Accelerated profile HMM searches. *PLoS Comput Biol* 7: e1002195.**

Google Scholar: [Author Only](#) [Title Only](#) [Author and Title](#)

**Finet C, Slavik K, Pu J, Carroll SB, Chung H (2019) Birth-and-death evolution of the Fatty acyl-CoA reductase (FAR) gene family and diversification of cuticular hydrocarbon synthesis in drosophila. *Genome Biol Evol* 11: 1541-1551.**

Google Scholar: [Author Only](#) [Title Only](#) [Author and Title](#)

**Frawley LE, Orr-Weaver TL (2015) Polyploidy. *Current Biology* 25: R353-R358.**

Google Scholar: [Author Only](#) [Title Only](#) [Author and Title](#)

**Gardiner LJ, Wingen LU, Bailey P, Joynson R, Brabbs T, Wright J, Higgins JD, Hall N, Griffiths S, et al. (2019) Analysis of the recombination landscape of hexaploid bread wheat reveals genes controlling recombination and gene conversion frequency. *Genome Biol* 20: 69.**

Google Scholar: [Author Only](#) [Title Only](#) [Author and Title](#)

**Godiard L, Grant MR, Dietrich RA, Kiedrowski S, Dangl JL (1994) Perception and response in plant disease resistance. *Curr Opin Genet Dev* 4: 662-671.**

Google Scholar: [Author Only](#) [Title Only](#) [Author and Title](#)

**Goff SA, Ricke D, Lan TH, Presting G, Wang R, Dunn M, Glazebrook J, Sessions A, Oeller P, et al. (2002) A draft sequence of the rice genome (*Oryza sativa* L. ssp. japonica). *Science* 296: 92-100.**

Google Scholar: [Author Only](#) [Title Only](#) [Author and Title](#)

**Guo H, Lee TH, Wang X, Paterson AH (2013) Function relaxation followed by diversifying selection after whole-genome duplication in flowering plants. *Plant Physiol* 162: 769-778.**

Google Scholar: [Author Only](#) [Title Only](#) [Author and Title](#)

**Harpak A, Lan X, Gao Z, Pritchard JK (2017) Frequent nonallelic gene conversion on the human lineage and its effect on the divergence of gene duplicates. *Proc Natl Acad Sci U S A* 114: 12779-12784.**

Google Scholar: [Author Only](#) [Title Only](#) [Author and Title](#)

**Huang X, Wei X, Sang T, Zhao Q, Feng Q, Zhao Y, Li C, Zhu C, Lu T, et al. (2010) Genome-wide association studies of 14 agronomic traits in rice landraces. *Nat Genet* 42: 961-967.**

Google Scholar: [Author Only](#) [Title Only](#) [Author and Title](#)

**Jacquemin J, Chaparro C, Laudíe M, Berger A, Gavory F, Goicoechea JL, Wing RA, Cooke R (2011) Long-range and targeted ectopic recombination between the two homeologous chromosomes 11 and 12 in *Oryza* species. *Mol Biol Evol* 28: 3139-3150.**

Google Scholar: [Author Only](#) [Title Only](#) [Author and Title](#)

Jacquemin J, Laudie M, Cooke R (2009) A recent duplication revisited: phylogenetic analysis reveals an ancestral duplication highly conserved throughout the *Oryza* genus and beyond. *BMC Plant Biol* 9: 146.

Google Scholar: [Author Only](#) [Title Only](#) [Author and Title](#)

Jang CS, Yim WC, Moon JC, Hung JH, Lee TG, Lim SD, Cho SH, Lee KK, Kim W, et al. (2008) Evolution of non-specific lipid transfer protein (nsLTP) genes in the Poaceae family: their duplication and diversity. *Mol Genet Genomics* 279: 481-497.

Google Scholar: [Author Only](#) [Title Only](#) [Author and Title](#)

Jiao Y, Wickett NJ, Ayyampalayam S, Chanderbali AS, Landherr L, Ralph PE, Tomsho LP, Hu Y, Liang H, et al. (2011) Ancestral polyploidy in seed plants and angiosperms. *Nature* 473: 97-100.

Google Scholar: [Author Only](#) [Title Only](#) [Author and Title](#)

Jones P, Binns D, Chang H-Y, Fraser M, Li W, Mcanulla C, McWilliam H, Maslen J, Mitchell A, et al. (2014) InterProScan 5: genome-scale protein function classification. *Bioinformatics* 30: 1236-1240.

Google Scholar: [Author Only](#) [Title Only](#) [Author and Title](#)

Jung CG, Lim SD, Hwang SG, Jang CS (2012) Molecular characterization and concerted evolution of two genes encoding RING-C2 type proteins in rice. *Gene* 505: 9-18.

Google Scholar: [Author Only](#) [Title Only](#) [Author and Title](#)

Keen NT (1992) The molecular biology of disease resistance. *Plant Mol Biol* 19: 109-122.

Google Scholar: [Author Only](#) [Title Only](#) [Author and Title](#)

Kim H, Hurwitz B, Yu Y, Collura K, Gill N, Sanmiguel P, Mullikin JC, Maher C, Nelson W, et al. (2008) Construction, alignment and analysis of twelve framework physical maps that represent the ten genome types of the genus *Oryza*. *Genome Biology* 9: R45.

Google Scholar: [Author Only](#) [Title Only](#) [Author and Title](#)

Kozul R, Fischer G (2009) A prominent role for segmental duplications in modeling Eukaryotic genomes. *Comptes Rendus Biologies* 332: 254-266.

Google Scholar: [Author Only](#) [Title Only](#) [Author and Title](#)

Kurosawa K, Ohta K (2011) Genetic diversification by somatic gene conversion. *Genes (Basel)* 2: 48-58.

Google Scholar: [Author Only](#) [Title Only](#) [Author and Title](#)

Larkin MA, Blackshields G, Brown N, Chenna R, Mcgettigan P, McWilliam H, Valentin F, Wallace IMW, Wilm A, et al. (2007) Clustal W and Clustal X version 2.0. *Bioinformatics* 23: 2947-2948.

Google Scholar: [Author Only](#) [Title Only](#) [Author and Title](#)

Li X, Chen Z, Zhang G, Lu H, Qin P, Qi M, Yu Y, Jiao B, Zhao X, et al. (2020) Analysis of genetic architecture and favorable allele usage of agronomic traits in a large collection of Chinese rice accessions. *Sci China Life Sci* 63: 1688-1702.

Google Scholar: [Author Only](#) [Title Only](#) [Author and Title](#)

Liu C, Wang J, Sun P, Yu J, Meng F, Zhang Z, Guo H, Wei C, Li X, et al. (2020) Illegitimate recombination between homeologous genes in wheat genome. *Front Plant Sci* 11: 1076.

Google Scholar: [Author Only](#) [Title Only](#) [Author and Title](#)

Mao D, Yu H, Liu T, Yang G, Xing Y (2011) Two complementary recessive genes in duplicated segments control etiolation in rice. *Theor Appl Genet* 122: 373-383.

Google Scholar: [Author Only](#) [Title Only](#) [Author and Title](#)

Ming R, Vanburen R, Wai CM, Tang H, Schatz MC, Bowers JE, Lyons E, Wang ML, Chen J, et al. (2015) The pineapple genome and the evolution of CAM photosynthesis. *Nat Genet* 47: 1435-1442.

Google Scholar: [Author Only](#) [Title Only](#) [Author and Title](#)

Murat F, Armero A, Pont C, Klopp C, Salse J (2017) Reconstructing the genome of the most recent common ancestor of flowering plants. *Nat Genet* 49: 490-496.

Google Scholar: [Author Only](#) [Title Only](#) [Author and Title](#)

Murat F, Xu JH, Tannier E, Abrouk M, Guilhot N, Pont C, Messing J, Salse J (2010) Ancestral grass karyotype reconstruction unravels new mechanisms of genome shuffling as a source of plant evolution. *Genome Res* 20: 1545-1557.

Google Scholar: [Author Only](#) [Title Only](#) [Author and Title](#)

Murat F, Zhang R, Guizard S, Flores R, Armero A, Pont C, Steinbach D, Quesneville H, Cooke R, et al. (2014) Shared subgenome dominance following polyploidization explains grass genome evolutionary plasticity from a seven protochromosome ancestor with 16K protogenes. *Genome Biol Evol* 6: 12-33.

Google Scholar: [Author Only](#) [Title Only](#) [Author and Title](#)

Nawrocki EP, Eddy SR (2013) Infernal 1.1: 100-fold faster RNA homology searches. *Bioinformatics* 29: 2933-2935.

Google Scholar: [Author Only](#) [Title Only](#) [Author and Title](#)

Okuyama Y, Kanzaki H, Abe A, Yoshida K, Tamiru M, Saitoh H, Fujibe T, Matsumura H, Shenton M, et al. (2011) A multifaceted genomics approach allows the isolation of the rice Pia-blast resistance gene consisting of two adjacent NBS-LRR protein genes. *Plant J* 66: 467-479.

Google Scholar: [Author Only](#) [Title Only](#) [Author and Title](#)



- Paterson AH, Bowers JE, Bruggmann R, Dubchak I, Grimwood J, Gundlach H, Haberer G, Hellsten U, Mitros T, et al. (2009) The *Sorghum bicolor* genome and the diversification of grasses. *Nature* 457: 551-556.  
Google Scholar: [Author Only](#) [Title Only](#) [Author and Title](#)
- Paterson AH, Bowers JE, Chapman BA (2004) Ancient polyploidization predating divergence of the cereals, and its consequences for comparative genomics. *Proc Natl Acad Sci U S A* 101: 9903-9908.  
Google Scholar: [Author Only](#) [Title Only](#) [Author and Title](#)
- Paterson AH, Wendel JF, Gundlach H, Guo H, Jenkins J, Jin D, Llewellyn D, Showmaker KC, Shu S, et al. (2012) Repeated polyploidization of *Gossypium* genomes and the evolution of spinnable cotton fibres. *Nature* 492: 423-427.  
Google Scholar: [Author Only](#) [Title Only](#) [Author and Title](#)
- Puchta H, Dujon B, Hohn B (1996) Two different but related mechanisms are used in plants for the repair of genomic double-strand breaks by homologous recombination. *Proc Natl Acad Sci U S A* 93: 5055-5060.  
Google Scholar: [Author Only](#) [Title Only](#) [Author and Title](#)
- Ratnaparkhe MB, Wang X, Li J, Compton RO, Rainville LK, Lemke C, Kim C, Tang H, Paterson AH (2011) Comparative analysis of peanut NBS-LRR gene clusters suggests evolutionary innovation among duplicated domains and erosion of gene microsynteny. *New Phytol* 192: 164-178.  
Google Scholar: [Author Only](#) [Title Only](#) [Author and Title](#)
- Ricachenevsky FK, Sperotto RA, Menguer PK, Sperb ER, Lopes KL, Fett JP (2011) ZINC-INDUCED FACILITATOR-LIKE family in plants: lineage-specific expansion in monocotyledons and conserved genomic and expression features among rice (*Oryza sativa*) paralogs. *BMC Plant Biol* 11: 20.  
Google Scholar: [Author Only](#) [Title Only](#) [Author and Title](#)
- Rooney AP (2004) Mechanisms underlying the evolution and maintenance of functionally heterogeneous 18S rRNA genes in Apicomplexans. *Mol Biol Evol* 21: 1704-1711.  
Google Scholar: [Author Only](#) [Title Only](#) [Author and Title](#)
- Stein JC, Yu Y, Copetti D, Zwickl DJ, Zhang L, Zhang C, Chougule K, Gao D, Iwata A, et al. (2018) Genomes of 13 domesticated and wild rice relatives highlight genetic conservation, turnover and innovation across the genus *Oryza*. *Nature Genetics* 50: 285-296.  
Google Scholar: [Author Only](#) [Title Only](#) [Author and Title](#)
- Sweeney M, McCouch S (2007) The complex history of the domestication of rice. *Ann Bot* 100: 951-957.  
Google Scholar: [Author Only](#) [Title Only](#) [Author and Title](#)
- Tanaka T, Antonio BA, Kikuchi S, Matsumoto T, Nagamura Y, Numa H, Sakai H, Wu J, Itoh T, et al. (2008) The Rice Annotation Project Database (RAP-DB): 2008 update. *Nucleic Acids Res* 36: D1028-1033.  
Google Scholar: [Author Only](#) [Title Only](#) [Author and Title](#)
- Tang H, Bowers JE, Wang X, Paterson AH (2010) Angiosperm genome comparisons reveal early polyploidy in the monocot lineage. *Proc Natl Acad Sci U S A* 107: 472-477.  
Google Scholar: [Author Only](#) [Title Only](#) [Author and Title](#)
- Taylor JS, Raes J (2004) Duplication and divergence: the evolution of new genes and old ideas. *Annu Rev Genet* 38: 615-643.  
Google Scholar: [Author Only](#) [Title Only](#) [Author and Title](#)
- Wang HW, Hwang S-G, Karuppanapandian T, Liu A, Kim W, Jang CS (2012) Insight into the molecular evolution of non-specific lipid transfer proteins via comparative analysis between rice and sorghum. *DNA Res* 19: 179-194.  
Google Scholar: [Author Only](#) [Title Only](#) [Author and Title](#)
- Wang J, Sun P, Li Y, Liu Y, Yang N, Yu J, Ma X, Sun S, Xia R, et al. (2018a) An overlooked paleotetraploidization in cucurbitaceae. *Mol Biol Evol* 35: 16-26.  
Google Scholar: [Author Only](#) [Title Only](#) [Author and Title](#)
- Wang J, Sun P, Li Y, Liu Y, Yu J, Ma X, Sun S, Yang N, Xia R, et al. (2017) Hierarchically Aligning 10 legume genomes establishes a family-level genomics Platform. *Plant Physiol* 174: 284-300.  
Google Scholar: [Author Only](#) [Title Only](#) [Author and Title](#)
- Wang W, Mauleon R, Hu Z, Chebotarov D, Tai S, Wu Z, Li M, Zheng T, Fuentes RR, et al. (2018b) Genomic variation in 3,010 diverse accessions of Asian cultivated rice. *Nature* 557: 43-49.  
Google Scholar: [Author Only](#) [Title Only](#) [Author and Title](#)
- Wang X, Shi X, Hao B, Ge S, Luo J (2005) Duplication and DNA segmental loss in the rice genome: implications for diploidization. *New Phytol* 165: 937-946.  
Google Scholar: [Author Only](#) [Title Only](#) [Author and Title](#)
- Wang X, Tang H, Bowers JE, Feltus FA, Paterson AH (2007) Extensive concerted evolution of rice paralogs and the road to regaining independence. *Genetics* 177: 1753-1763.  
Google Scholar: [Author Only](#) [Title Only](#) [Author and Title](#)
- Wang X, Tang H, Bowers JE, Paterson AH (2009) Comparative inference of illegitimate recombination between rice and sorghum



**duplicated genes produced by polyploidization. Genome Res 19: 1026-1032.**

Google Scholar: [Author Only](#) [Title Only](#) [Author and Title](#)

**Wang X, Tang H, Paterson AH (2011) Seventy million years of concerted evolution of a homeologous chromosome pair, in parallel, in major Poaceae lineages. Plant Cell 23: 27-37.**

Google Scholar: [Author Only](#) [Title Only](#) [Author and Title](#)

**Wang X, Wang J, Jin D, Guo H, Lee TH, Liu T, Paterson AH (2015) Genome alignment spanning major poaceae lineages reveals heterogeneous evolutionary rates and alters inferred dates for key evolutionary events. Mol Plant 8: 885-898.**

Google Scholar: [Author Only](#) [Title Only](#) [Author and Title](#)

**Wang XY, Paterson AH (2011) Gene conversion in angiosperm genomes with an emphasis on genes duplicated by polyploidization. Genes (Basel) 2: 1-20.**

Google Scholar: [Author Only](#) [Title Only](#) [Author and Title](#)

**Wang Z, Wang J, Pan Y, Lei T, Ge W, Wang L, Zhang L, Li Y, Zhao K, et al. (2019) Reconstruction of evolutionary trajectories of chromosomes unraveled independent genomic repatterning between Triticeae and Brachypodium. BMC Genomics 20: 180.**

Google Scholar: [Author Only](#) [Title Only](#) [Author and Title](#)

**Wicker T, Wing RA, Schubert I (2015) Recurrent sequence exchange between homeologous grass chromosomes. Plant J 84: 747-759.**

Google Scholar: [Author Only](#) [Title Only](#) [Author and Title](#)

**Woodhouse MR, Schnable JC, Pedersen BS, Lyons E, Lisch D, Subramaniam S, Freeling M (2010) Following tetraploidy in maize, a short deletion mechanism removed genes preferentially from one of the two homologs. PLoS Biol 8: e1000409.**

Google Scholar: [Author Only](#) [Title Only](#) [Author and Title](#)

**Wu S, Han B, Jiao Y (2020) Genetic contribution of paleopolyploidy to adaptive evolution in angiosperms. Mol Plant 13: 59-71.**

Google Scholar: [Author Only](#) [Title Only](#) [Author and Title](#)

**Ye J, Zhang Y, Cui H, Liu J, Wu Y, Cheng Y, Xu H, Huang X, Li S, et al. (2018) WEGO 2.0: a web tool for analyzing and plotting GO annotations, 2018 update. Nucleic Acids Res 46: w71-w75.**

Google Scholar: [Author Only](#) [Title Only](#) [Author and Title](#)

**Yu J, Hu S, Wang J, Wong GK, Li S, Liu B, Deng Y, Dai L, Zhou Y, et al. (2002) A draft sequence of the rice genome (*Oryza sativa* L. ssp. indica). Science 296: 79-92.**

Google Scholar: [Author Only](#) [Title Only](#) [Author and Title](#)

**Yu J, Zhao M, Wang X, Tong C, Huang S, Tehrim S, Liu Y, Hua W, Liu S (2013) Bolbase: a comprehensive genomics database for Brassica oleracea. BMC Genomics 14: 664.**

Google Scholar: [Author Only](#) [Title Only](#) [Author and Title](#)

**Zhang H, Zhang CQ, Sun ZZ, Yu W, Gu MH, Liu QQ, Li YS (2011) A major locus qS12, located in a duplicated segment of chromosome 12, causes spikelet sterility in an indica-japonica rice hybrid. Theor Appl Genet 123: 1247-1256.**

Google Scholar: [Author Only](#) [Title Only](#) [Author and Title](#)

**Zhang J, Chen LL, Xing F, Kudrna DA, Yao W, Copetti D, Mu T, Li W, Song JM, et al. (2016) Extensive sequence divergence between the reference genomes of two elite indica rice varieties Zhenshan 97 and Minghui 63. Proc Natl Acad Sci U S A 113: E5163-5171.**

Google Scholar: [Author Only](#) [Title Only](#) [Author and Title](#)

**Zhang QJ, Zhu T, Xia EH, Shi C, Liu YL, Zhang Y, Liu Y, Jiang WK, Zhao YJ, et al. (2014) Rapid diversification of five *Oryza* AA genomes associated with rice adaptation. Proc Natl Acad Sci U S A 111: E4954-4962.**

Google Scholar: [Author Only](#) [Title Only](#) [Author and Title](#)

**Zhuang W, Chen H, Yang M, Wang J, Pandey MK, Zhang C, Chang W-C, Zhang L, Zhang X, et al. (2019) The genome of cultivated peanut provides insight into legume karyotypes, polyploid evolution and crop domestication. Nature Genetics 51: 865-876.**

Google Scholar: [Author Only](#) [Title Only](#) [Author and Title](#)
